# Supplementary material for: A viral protein activates MAPKs pathway to promote viral infection by downregulating callose deposition in plants
Source: Research Square preprint supplement (doi:10.21203/rs.3.rs-3247000/v1), 2023-08-17
Supplement: Supplementary file 1 [file e9293611c67e81af95ed1f02.docx]

**A viral protein activates MAPKs pathway to promote viral infection by downregulating callose deposition in plants**

Authors: Lixiao Feng1, Xiangwen Luo3, Yu Zhang3, Shijun Li4, Zhanhong Zhang1,3, Xiao Yang1, Xin Wang1, Xian OuYang3,4, Xiaobin Shi1,3, Deyong Zhang1,3, Xiaorong Tao5, Jianping Chen2, Jian Yang2*, Songbai Zhang1,3*, Yong Liu1,3*

**SI Appendix**

**Fig S1. The silencing efficiency of *NbMKKKα*, *NbMKK2*, *NbMPK3,* and *NbMPK6*.** The relative expression level of *NbMKKKα*, *NbMKK2*, *NbMPK3*, and *NbMPK6* in the TRV-VIGS plants was determined through RT-qPCR using gene specific primers. The data presented are the means ± SD, determined using the Student’ s *t*-test. Each treatment had three biological replicates. **ρ* < 0.05.

**Fig S2. Relative expression level of DEGs of the MAPK pathway.** MAPK pathway differentially expressed genes of WT and OE-P7 were verified by RT-qPCR. The data presented are the means ± SD, determined using the Student’ s *t*-test. Each treatment had three biological replicates. **ρ* < 0.05.

**Fig S3. Prediction of subcellular location of P7/mP7. A.** Prediction of subcellular location of P7 using the TMHMM software (<http://www.cbs.dtu.dk/services/TMHMM-2.0/>). The red section indicates the presence of a transmembrane domain at 5-27 aa of P7. **B.** Prediction of subcellular location of mP7 using TMHMM. The result showed that the transmembrane domain of P7 was disrupted by mutating the valine acid at position 15, 16, 20 and 26 to aspartic acid.

**Fig S4. The silencing efficiency of *NbMPK3*.** The relative expression level of *NbMPK3* in the assayed plants was determined through RT-qPCR using gene specific primers. The data presented are the means ± SD, determined using the Student’ s *t*-test. Each treatment had three biological replicates. **ρ* < 0.05.

**Table S1 Differentially expressed genes (DEGs) induced in OE-P7 plants.**

**Table S2 LC-MS/MS analysis of ToCV P7 candidate interacting proteins**

**Table S3 Identification of phosphorylated residues of P7 by LC-MS/MS**

**Table S4 Primers used in this study**

**Fig. S1**


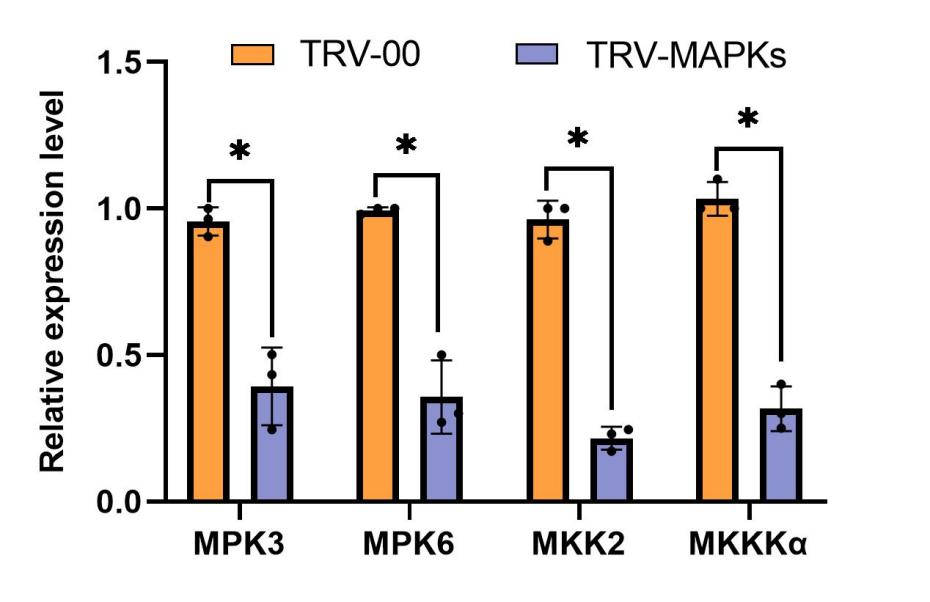


**Fig. S2**


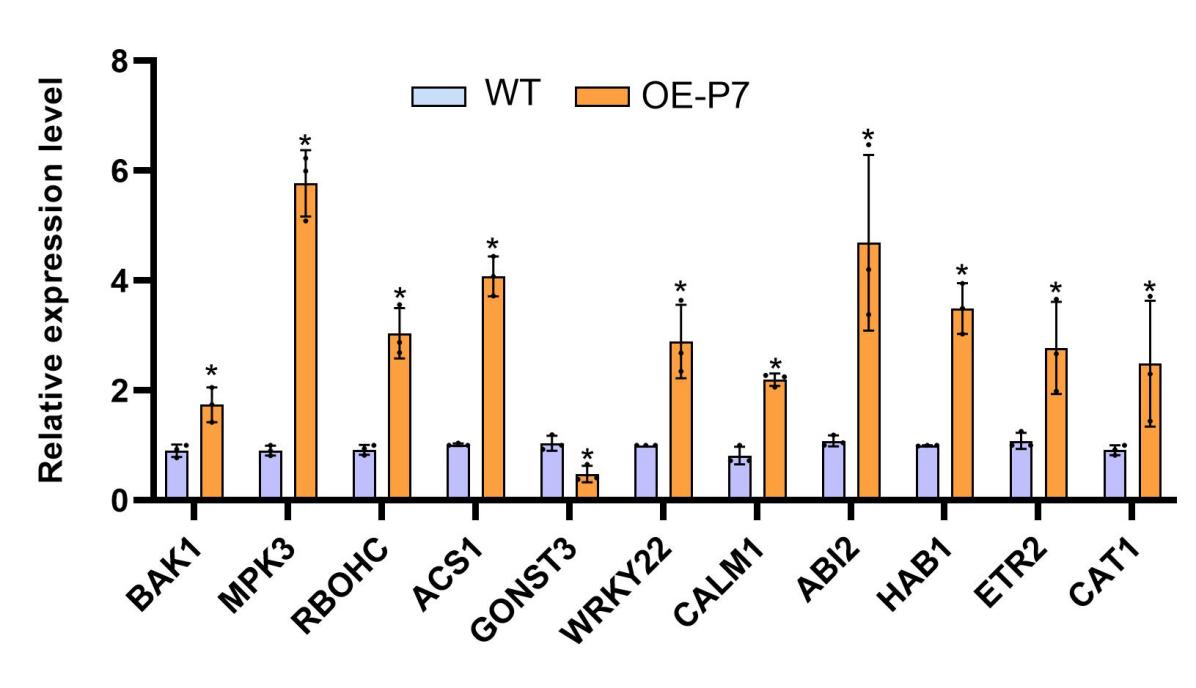


**Fig. S3**


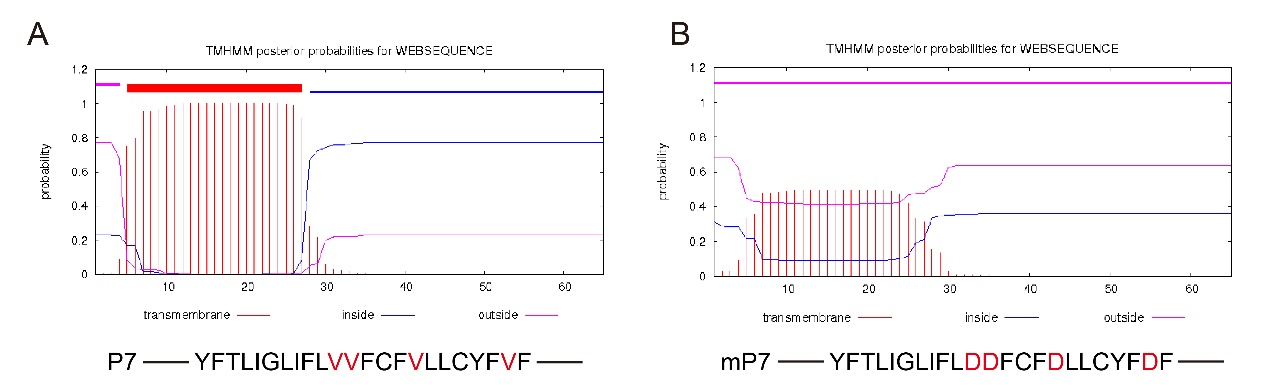


**Fig. S4**


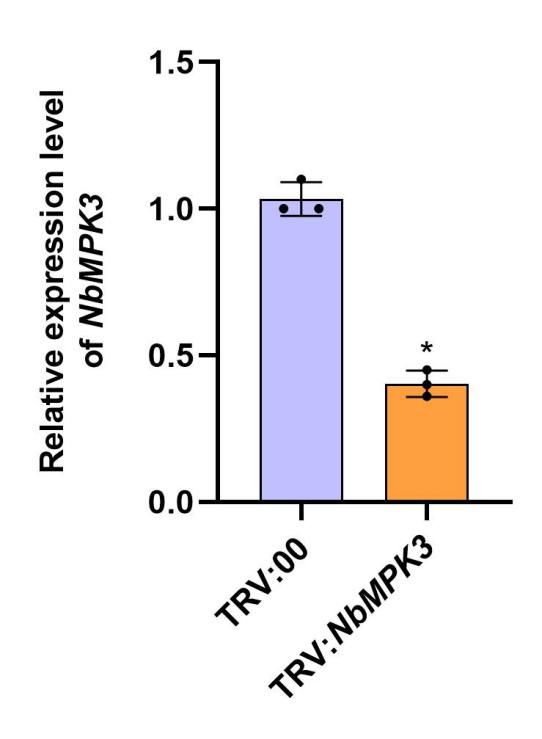


**Table S1 Differentially expressed genes (DEGs) induced in OE-P7 plants.**

| **gene_id** | **WT_1** | **WT_2** | **WT_3** | **OE-P7_1** | **OE-P7_2** | **OE-P7_3** | **log2FoldChange** | ***p*-value** | **Regulation** |
| --- | --- | --- | --- | --- | --- | --- | --- | --- | --- |
| Niben101Scf07275g02012 | 0.522954377 | 0 | 0 | 7.101624238 | 13.03327332 | 9.690702244 | 5.819463325 | 4.76E-05 | Up |
| Niben101Scf07474g01009 | 0 | 0 | 0 | 1.219958282 | 4.851018103 | 7.638150678 | 5.537355578 | 0.001888727 | Up |
| Niben101Scf09372g01018 | 0 | 0 | 0 | 7.358753686 | 10.05853865 | 3.839425651 | 5.516524663 | 0.001524746 | Up |
| Niben101Scf00526g02019 | 0 | 0 | 0 | 6.61958616 | 0.877399738 | 1.842008216 | 5.351332836 | 0.003861871 | Up |
| Niben101Scf07073g04002 | 0 | 0 | 0 | 1.520917153 | 9.071617554 | 3.174150722 | 5.193731753 | 0.006203397 | Up |
| Niben101Scf01606g02019 | 0 | 0 | 0 | 30.74127753 | 14.10450127 | 0 | 5.175248427 | 0.011684129 | Up |
| Niben101Scf02160g06059 | 0 | 0 | 0 | 0 | 5.974633998 | 5.574717322 | 5.163095843 | 0.012057448 | Up |
| Niben101Scf09454g00008 | 0 | 0 | 0.546350007 | 3.856495781 | 0 | 14.3723181 | 5.144243125 | 0.003456924 | Up |
| Niben101Scf08926g01013 | 0 | 0 | 0 | 0 | 9.417334686 | 4.11889604 | 5.134256746 | 0.013536374 | Up |
| Niben101Ctg07960g00001 | 0 | 0 | 0 | 17.40747195 | 8.652341112 | 24.21957022 | 5.128395706 | 0.006356979 | Up |
| Niben101Scf11037g02027 | 0 | 0 | 0.325662021 | 2.627126395 | 2.611613424 | 5.482806954 | 5.09322993 | 0.001156699 | Up |
| Niben101Scf01523g00023 | 0 | 0 | 0 | 2.068386583 | 0 | 5.935487533 | 4.999773076 | 0.019447835 | Up |
| Niben101Scf09501g01006 | 0 | 0 | 0 | 0.631423236 | 0.418463155 | 2.196298153 | 4.993575699 | 0.011471869 | Up |
| Niben101Scf02571g01006 | 0 | 0 | 0 | 1.797543529 | 3.21647252 | 0.750293871 | 4.988213567 | 0.010509065 | Up |
| Niben101Scf04489g00025 | 0 | 0 | 0 | 6.125645626 | 0 | 2.13070147 | 4.96486048 | 0.02087517 | Up |
| Niben101Scf20124g00012 | 0 | 0 | 0 | 0 | 1.379736807 | 3.620764894 | 4.921835686 | 0.023346695 | Up |
| Niben101Scf01899g02003 | 0 | 0 | 0 | 2.269503328 | 0.846038285 | 1.184112102 | 4.897201587 | 0.012803576 | Up |
| Niben101Scf04655g02004 | 0 | 0 | 0 | 0 | 20.89101492 | 21.92924129 | 4.887535401 | 0.024193489 | Up |
| Niben101Scf04871g19004 | 0 | 0 | 0 | 1.351264946 | 2.68657167 | 5.640173886 | 4.884041755 | 0.014518567 | Up |
| Niben101Scf00837g11004 | 0.340963377 | 1.066924319 | 0 | 22.08258736 | 0.708135208 | 15.23821567 | 4.879005613 | 1.19E-05 | Up |
| Niben101Scf03565g02017 | 0 | 0 | 0 | 0 | 0 | 4.635558618 | 4.862242578 | 0.046565176 | Up |
| Niben101Scf11756g01002 | 0 | 0.251447923 | 0 | 1.007288676 | 2.753686972 | 3.153313846 | 4.848850759 | 0.002990857 | Up |
| Niben101Scf02455g01006 | 0 | 0 | 0 | 12.26770232 | 1.742180359 | 10.97257179 | 4.827587073 | 0.018252195 | Up |
| Niben101Scf04185g04009 | 0.429415981 | 0 | 0 | 4.037116168 | 5.351036426 | 2.80848416 | 4.795610344 | 0.003096916 | Up |
| Niben101Scf02763g05012 | 0.684279848 | 0 | 1.417719825 | 22.15878676 | 24.87025585 | 6.713033049 | 4.752450918 | 2.02E-05 | Up |
| Niben101Scf00597g00010 | 0 | 0 | 0 | 1.450622663 | 0 | 16.65095452 | 4.724024288 | 0.042349626 | Up |
| Niben101Scf02513g07008 | 0 | 0 | 0 | 0 | 0.625723848 | 3.284103072 | 4.718135604 | 0.039267081 | Up |
| Niben101Scf06342g01002 | 0 | 0 | 0 | 5.626498404 | 0.932212397 | 0 | 4.716523113 | 0.039148574 | Up |
| Niben101Scf02869g04008 | 0 | 0 | 0 | 0 | 5.776317489 | 0.505282057 | 4.710826287 | 0.043362368 | Up |
| Niben101Scf08515g00010 | 0 | 0 | 0 | 4.862650616 | 0.690562436 | 2.899526012 | 4.581385997 | 0.033186814 | Up |
| Niben101Scf06458g01023 | 0 | 0.328006757 | 0 | 0.328494951 | 0 | 6.85568234 | 4.579305721 | 0.020270082 | Up |
| Niben101Scf05245g00008 | 0.333958067 | 0 | 0 | 6.628207155 | 1.733965295 | 0 | 4.539494153 | 0.01611661 | Up |
| Niben101Scf04574g01004 | 0 | 0.539773124 | 0.536084558 | 10.81153008 | 4.299075542 | 7.897273743 | 4.538480286 | 0.000826895 | Up |
| Niben101Scf06621g01007 | 0 | 0 | 0 | 0.621882066 | 0.927314854 | 1.946799737 | 4.528199993 | 0.034951455 | Up |
| Niben101Scf03926g00001 | 0 | 0 | 0 | 5.057895405 | 1.117339764 | 0.586434249 | 4.522092962 | 0.040375648 | Up |
| Niben101Scf10120g01001 | 0 | 0 | 0 | 2.086792306 | 0.460993325 | 0.241951717 | 4.522092962 | 0.040375648 | Up |
| Niben101Scf05720g00004 | 0 | 0 | 0 | 2.123515287 | 2.110976099 | 1.661914384 | 4.467211818 | 0.037691233 | Up |
| Niben101Scf00491g03003 | 0.36186916 | 0 | 0 | 0.756017943 | 1.503107434 | 5.522327187 | 4.460796479 | 0.012407147 | Up |
| Niben101Scf08011g02012 | 0.365066826 | 0 | 0 | 4.957540337 | 1.516389679 | 1.591750104 | 4.400017883 | 0.01196412 | Up |
| Niben101Scf21574g00011 | 0 | 0 | 0.43357451 | 3.497660046 | 5.215509966 | 0.456225547 | 4.39901396 | 0.014456358 | Up |
| Niben101Scf02792g03029 | 0 | 0.798614136 | 0 | 5.598619358 | 3.975399971 | 6.676746384 | 4.389641035 | 0.011032998 | Up |
| Niben101Scf12623g00009 | 0 | 0 | 0 | 1.692393107 | 2.523599491 | 4.415025821 | 4.381740035 | 0.047663383 | Up |
| Niben101Scf03850g03025 | 9.680126217 | 10.09684399 | 0 | 71.50537904 | 160.8345918 | 120.5911655 | 4.318905817 | 0.000175175 | Up |
| Niben101Scf01792g00024 | 0.477611512 | 0 | 0 | 3.991308598 | 0 | 5.206157615 | 4.254769023 | 0.028900005 | Up |
| Niben101Scf07365g01037 | 4.755498799 | 3.720162972 | 1.231580352 | 50.91789908 | 49.3826663 | 68.68382615 | 4.249136786 | 5.14E-09 | Up |
| Niben101Scf12986g00001 | 0 | 0 | 0.599963793 | 0.604990994 | 9.021278555 | 1.262614861 | 4.218990744 | 0.026873464 | Up |
| Niben101Scf02571g01013 | 0 | 0.255928064 | 0 | 0.768926935 | 1.528772966 | 2.139665075 | 4.182484881 | 0.02059272 | Up |
| Niben101Scf19230g01018 | 0 | 0 | 0.473117464 | 6.679145158 | 0 | 1.991337302 | 4.165804269 | 0.036547095 | Up |
| Niben101Scf00318g00016 | 0 | 0.410073476 | 0 | 5.749573409 | 0 | 1.71419242 | 4.165787939 | 0.036752138 | Up |
| Niben101Scf02392g00001 | 0 | 0.448873831 | 0 | 1.798167676 | 3.128211869 | 2.814578961 | 4.158394543 | 0.020811555 | Up |
| Niben101Scf08334g02001 | 0.731210545 | 0 | 0 | 0.763823437 | 9.111757455 | 3.188195637 | 4.156511856 | 0.027519382 | Up |
| Niben101Scf03739g07008 | 0 | 0.687636507 | 0 | 2.754639844 | 0.684593479 | 7.904774953 | 4.123012922 | 0.029676519 | Up |
| Niben101Scf00481g01010 | 0.66057395 | 0 | 0 | 2.760145453 | 1.371923507 | 7.200521791 | 4.112699855 | 0.026992331 | Up |
| Niben101Scf05732g02013 | 0.916378465 | 0 | 0 | 12.44425098 | 2.85479277 | 0.998889391 | 4.057640922 | 0.034661789 | Up |
| Niben101Scf06583g04008 | 0.893262612 | 0 | 0 | 0.933103226 | 12.98630657 | 0.973692181 | 4.040301743 | 0.041970827 | Up |
| Niben101Scf04197g01022 | 0 | 0.41904591 | 0.416182339 | 4.196696034 | 2.503148928 | 5.693021949 | 4.033904467 | 0.005540641 | Up |
| Niben101Scf00254g05005 | 0 | 0 | 0.300772478 | 0.303292703 | 3.316519624 | 0.949456797 | 3.96943706 | 0.041217023 | Up |
| Niben101Scf08515g00019 | 8.332113442 | 7.449257909 | 2.466117679 | 26.11120793 | 9.888389843 | 208.8937931 | 3.957096544 | 0.002821166 | Up |
| Niben101Scf11609g04004 | 0 | 0 | 0.29876033 | 1.205054777 | 2.395878051 | 0.943104992 | 3.950426271 | 0.035204465 | Up |
| Niben101Scf02197g04006 | 0 | 0.50424442 | 0 | 4.039959361 | 1.004025931 | 2.634808193 | 3.946563388 | 0.036955256 | Up |
| Niben101Scf04926g03003 | 1.067299784 | 0 | 3.316915006 | 16.72354006 | 34.35789705 | 11.633997 | 3.932256106 | 0.000328905 | Up |
| Niben101Scf01119g00007 | 0 | 0 | 0.552819168 | 5.017062019 | 1.10831926 | 2.326799399 | 3.929255079 | 0.038756706 | Up |
| Niben101Scf01620g02013 | 0.697272503 | 0.727289245 | 0 | 5.826973734 | 5.06849518 | 8.360605858 | 3.892707806 | 0.008738268 | Up |
| Niben101Scf00095g08004 | 0 | 0.27331007 | 0 | 1.094867422 | 1.632603476 | 1.14249294 | 3.862839761 | 0.041425093 | Up |
| Niben101Scf07304g02018 | 0 | 1.159748031 | 0 | 4.645896636 | 3.752501178 | 6.059984978 | 3.810796947 | 0.000857592 | Up |
| Niben101Scf06369g02011 | 0 | 0.617436004 | 0.613216724 | 8.656969634 | 2.458814549 | 3.871516373 | 3.705692466 | 0.016294901 | Up |
| Niben101Scf00199g00010 | 0 | 0 | 0.961739713 | 10.66778127 | 0.964071716 | 0.505991723 | 3.665165872 | 0.033940076 | Up |
| Niben101Scf01922g01004 | 0.539750408 | 0.281493007 | 0 | 1.973383797 | 3.36296764 | 3.235923116 | 3.513207873 | 0.007474902 | Up |
| Niben101Scf01894g03006 | 0.403221431 | 0 | 0.417705577 | 2.106028022 | 6.699494704 | 0 | 3.496879347 | 0.046962211 | Up |
| Niben101Scf03226g01003 | 0.623990875 | 0.65085293 | 0 | 6.51821637 | 1.295945365 | 5.441401238 | 3.495305636 | 0.03108881 | Up |
| Niben101Scf01546g00008 | 0.426277515 | 0.444628249 | 0 | 0.890580035 | 3.983945542 | 3.717277114 | 3.461514719 | 0.033939763 | Up |
| Niben101Scf01413g01001 | 0 | 4.49654481 | 2.232908725 | 33.77427982 | 20.14490724 | 14.0973694 | 3.450514912 | 0.009303098 | Up |
| Niben101Scf01873g01004 | 0 | 0 | 1.841574206 | 0.928502538 | 6.922648537 | 9.688913679 | 3.392886616 | 0.010702924 | Up |
| Niben101Scf02868g05008 | 0.840985157 | 1.75437711 | 0 | 18.44837677 | 3.493226777 | 3.666830605 | 3.384548805 | 0.016401895 | Up |
| Niben101Scf08804g02014 | 4.103979717 | 0 | 0 | 14.57587573 | 11.08044015 | 14.31520955 | 3.376564534 | 0.002771284 | Up |
| Niben101Scf02171g00008 | 2.054966839 | 0 | 1.064391724 | 4.293241788 | 12.80367162 | 12.31998086 | 3.358873435 | 0.001009902 | Up |
| Niben101Scf05782g00010 | 2.562071059 | 0 | 0 | 9.367199055 | 13.30269499 | 1.39638026 | 3.29474505 | 0.014422556 | Up |
| Niben101Scf01782g05006 | 2.083028361 | 1.086350112 | 0 | 6.527801983 | 4.326170556 | 17.02938531 | 3.288211345 | 0.019498962 | Up |
| Niben101Scf01237g10006 | 0.570167625 | 0 | 1.771945969 | 9.529564865 | 5.32872762 | 5.593550827 | 3.20314217 | 0.008215881 | Up |
| Niben101Scf05592g00018 | 2.966850687 | 1.237828015 | 3.07342314 | 22.93390156 | 38.20285621 | 1.940391958 | 3.187117813 | 0.000273552 | Up |
| Niben101Scf09170g00002 | 1.491757522 | 0.518658629 | 0.51511435 | 9.349750483 | 5.67999725 | 5.962277598 | 3.147305149 | 0.00347136 | Up |
| Niben101Scf10566g01003 | 0 | 1.737186965 | 0 | 9.278786842 | 1.729499315 | 3.025751178 | 3.135037838 | 0.039380453 | Up |
| Niben101Scf01917g13024 | 0.383418987 | 1.199774137 | 0 | 5.206759302 | 5.574168714 | 1.671768478 | 3.096863341 | 0.015056131 | Up |
| Niben101Scf04434g00004 | 0 | 2.102043305 | 4.175357778 | 12.63103148 | 4.185482083 | 30.75442376 | 3.073786313 | 0.037397971 | Up |
| Niben101Scf07278g00007 | 1.223093955 | 1.70099557 | 0 | 9.582340904 | 4.233670199 | 8.22153328 | 3.044868416 | 5.53E-05 | Up |
| Niben101Scf02286g01005 | 1.725885987 | 0 | 0.89394083 | 9.46502881 | 3.136379524 | 7.525140615 | 3.02460336 | 0.004742441 | Up |
| Niben101Scf04487g06001 | 2.063520291 | 3.76661662 | 3.206466223 | 25.32778112 | 17.67832651 | 24.18019136 | 3.015645445 | 8.99E-07 | Up |
| Niben101Scf00712g16028 | 1.221461656 | 0.318511028 | 0 | 6.060716675 | 1.585507534 | 3.994327025 | 3.008588874 | 0.011517319 | Up |
| Niben101Scf01729g01002 | 1.384806564 | 0.722210409 | 0.717275149 | 5.062997255 | 14.3802876 | 1.509494862 | 2.98991448 | 0.02208847 | Up |
| Niben101Scf01212g01008 | 0 | 1.255611461 | 2.078385296 | 9.22152197 | 12.50054948 | 3.061751617 | 2.989820583 | 0.002114093 | Up |
| Niben101Scf07163g00011 | 1.009696028 | 0.526581113 | 0 | 2.63682429 | 6.291009729 | 2.201218576 | 2.97294928 | 0.042694267 | Up |
| Niben101Scf01926g05001 | 1.585166266 | 1.653405765 | 0 | 4.139666592 | 9.053488822 | 9.503422486 | 2.961782216 | 0.020807447 | Up |
| Niben101Scf08973g00012 | 3.104973381 | 1.079546249 | 0 | 19.46075414 | 1.074768886 | 10.15363767 | 2.957944375 | 0.007131544 | Up |
| Niben101Scf02831g05014 | 2.863599999 | 0 | 0 | 4.486980135 | 11.89462634 | 3.121439194 | 2.858887665 | 0.043663381 | Up |
| Niben101Scf08792g00010 | 3.018330288 | 0 | 0 | 6.305903082 | 3.134333615 | 10.69282966 | 2.85319982 | 0.042893549 | Up |
| Niben101Scf07759g01010 | 1.279795417 | 0 | 1.325767039 | 2.673751742 | 7.309399494 | 6.975142439 | 2.819961418 | 0.00437474 | Up |
| Niben101Scf14012g00006 | 0 | 2.191112937 | 3.626899765 | 15.36061879 | 13.08849906 | 9.159307804 | 2.79599501 | 0.003621318 | Up |
| Niben101Scf02786g02008 | 0 | 0.954944881 | 0.316139739 | 2.550309834 | 3.644422534 | 1.663278425 | 2.767054759 | 0.005607979 | Up |
| Niben101Scf15604g00022 | 0.49073076 | 0.255928064 | 0.254179167 | 2.306780805 | 0.254795494 | 3.476955746 | 2.721187422 | 0.048109646 | Up |
| Niben101Scf00956g01002 | 1.19030192 | 0 | 0.411019613 | 4.973563415 | 3.296129948 | 1.729969301 | 2.705483705 | 0.045358629 | Up |
| Niben101Scf03080g02012 | 2.272394575 | 0.790072808 | 3.923369035 | 14.24247705 | 6.292611718 | 21.46734633 | 2.702980431 | 0.003843294 | Up |
| Niben101Scf00187g02023 | 0.734188448 | 0 | 1.521122567 | 0.383467079 | 6.09924379 | 6.802507018 | 2.695384959 | 0.031367324 | Up |
| Niben101Scf09021g00006 | 3.137726265 | 0.818200401 | 1.218913782 | 13.93010908 | 8.553085617 | 8.550619627 | 2.672500873 | 0.000509604 | Up |
| Niben101Scf00229g07003 | 1.096815818 | 0.572016209 | 1.136214617 | 6.301543359 | 6.833818091 | 3.586720091 | 2.669494902 | 0.021577727 | Up |
| Niben101Scf04993g05001 | 2.360765475 | 0.615598397 | 3.056958373 | 13.5633219 | 11.64460908 | 10.29331734 | 2.648282484 | 0.00194632 | Up |
| Niben101Scf07391g04030 | 0.557661136 | 1.163335553 | 1.733078763 | 9.903069674 | 4.053655875 | 4.862984571 | 2.536608208 | 0.022243644 | Up |
| Niben101Scf05112g00010 | 0.77508032 | 1.212669892 | 0.602191526 | 4.453074221 | 3.219475763 | 5.702863917 | 2.504231022 | 0.001221068 | Up |
| Niben101Scf01774g01001 | 1.489218233 | 0.621330914 | 0.617085019 | 5.60030113 | 5.257941145 | 3.571277119 | 2.500736481 | 0.006403585 | Up |
| Niben101Scf06504g01012 | 2.02868849 | 3.703036902 | 0 | 5.827718871 | 10.00662059 | 12.71527436 | 2.484769204 | 0.007554881 | Up |
| Niben101Scf00621g08001 | 3.472929946 | 1.207478466 | 4.796908411 | 13.9066698 | 17.43095691 | 17.66628896 | 2.478829237 | 0.000565903 | Up |
| Niben101Scf10055g07005 | 5.621360443 | 6.765407586 | 7.167120896 | 36.13587723 | 31.88121677 | 32.52293246 | 2.476777977 | 8.75E-09 | Up |
| Niben101Scf04418g04003 | 1.346078604 | 1.6848308 | 0.836658713 | 10.12403066 | 4.472999587 | 5.282207379 | 2.463386861 | 0.001206338 | Up |
| Niben101Scf01413g01007 | 0.487473697 | 4.576129674 | 0 | 13.23960625 | 9.111757455 | 3.188195637 | 2.461534658 | 0.019638742 | Up |
| Niben101Scf02912g00010 | 0.95109976 | 0.992043459 | 2.463160704 | 12.91575977 | 1.481479989 | 8.293895988 | 2.449074477 | 0.016042178 | Up |
| Niben101Scf13666g00001 | 3.385476738 | 0 | 0.438385836 | 3.978532322 | 5.273385876 | 9.687052812 | 2.433550289 | 0.023999004 | Up |
| Niben101Scf05506g09007 | 4.880643505 | 4.307557126 | 1.944600556 | 9.412294566 | 26.51069454 | 18.00648471 | 2.41702048 | 5.70E-05 | Up |
| Niben101Scf11886g03034 | 0 | 1.346872027 | 0 | 2.119663329 | 2.68182331 | 1.608630059 | 2.416859008 | 0.049484613 | Up |
| Niben101Scf08874g01015 | 3.972896679 | 1.775967899 | 2.351775646 | 16.60037108 | 14.14486904 | 9.279893997 | 2.397205239 | 0.001628445 | Up |
| Niben101Scf04286g00018 | 2.915167952 | 1.140248408 | 0 | 9.135564112 | 6.811214503 | 3.972062921 | 2.388991093 | 0.011891801 | Up |
| Niben101Scf09550g01005 | 0 | 0.772756144 | 1.279125795 | 2.0637501 | 1.538672865 | 5.92218258 | 2.368799044 | 0.033046282 | Up |
| Niben101Scf01166g14001 | 2.087413683 | 0.362879055 | 0 | 2.180514908 | 5.780371045 | 3.413047329 | 2.334811614 | 0.049666786 | Up |
| Niben101Scf02581g04013 | 29.06098782 | 12.33031662 | 15.81782336 | 78.20823465 | 83.62855184 | 103.6234853 | 2.334595232 | 6.52E-14 | Up |
| Niben101Scf34085g00001 | 33.68225901 | 24.1534148 | 39.25368204 | 61.57292627 | 113.6744943 | 259.2998095 | 2.316965654 | 4.43E-05 | Up |
| Niben101Scf00662g01003 | 2.09181751 | 0.436373547 | 0.866783134 | 0.43702303 | 6.951079105 | 7.752561795 | 2.308082311 | 0.04699188 | Up |
| Niben101Scf08653g04019 | 0 | 0.882804359 | 0.292257224 | 1.620883539 | 0.878897646 | 2.460203889 | 2.242462818 | 0.046199829 | Up |
| Niben101Scf01721g10012 | 6.844822976 | 1.019926338 | 1.012956621 | 26.55755337 | 4.061651252 | 9.592884505 | 2.240537937 | 0.041413912 | Up |
| Niben101Scf00120g00012 | 0.680289194 | 1.419149648 | 0.70472591 | 3.908470118 | 0.706434712 | 7.044654579 | 2.210431437 | 0.047892464 | Up |
| Niben101Scf17987g00001 | 41.31339582 | 2.267994093 | 20.27246079 | 54.5128727 | 112.897872 | 101.9173855 | 2.190179552 | 0.001686177 | Up |
| Niben101Scf00725g04002 | 3.618691605 | 8.178022495 | 0 | 22.05052332 | 13.77848481 | 13.14839806 | 2.186792916 | 0.006641753 | Up |
| Niben101Scf05302g01001 | 1.031044887 | 0.358476709 | 1.068081123 | 4.308123042 | 3.568903266 | 2.622387607 | 2.18313361 | 0.045287995 | Up |
| Niben101Scf02282g01016 | 1.825166129 | 0.951868667 | 2.836092076 | 5.481391019 | 8.055078725 | 9.698834449 | 2.169521868 | 0.000827356 | Up |
| Niben101Scf01053g00006 | 1.292165291 | 2.470950992 | 3.123356253 | 1.799729941 | 23.48197268 | 3.051776319 | 2.163731104 | 0.006526308 | Up |
| Niben101Scf04296g00024 | 3.198456451 | 5.242515378 | 5.680025881 | 35.32032213 | 12.811047 | 9.961274847 | 2.115218114 | 0.00069955 | Up |
| Niben101Scf07838g00012 | 0 | 1.592718644 | 1.318195602 | 8.77299055 | 1.849948703 | 1.3870615 | 2.112202461 | 0.048304418 | Up |
| Niben101Scf02631g01015 | 7.037939664 | 2.590910997 | 3.859808819 | 29.40736181 | 10.3177813 | 15.3432747 | 2.110849393 | 0.00048005 | Up |
| Niben101Scf04407g02024 | 4.156078142 | 4.334992302 | 1.845158108 | 24.80825344 | 13.56396948 | 3.88310774 | 2.109117445 | 0.009518637 | Up |
| Niben101Scf09512g02006 | 0.577473209 | 3.011663676 | 3.589299989 | 4.825833809 | 7.795673676 | 15.10725667 | 2.105339043 | 0.024020016 | Up |
| Niben101Scf00504g06016 | 0 | 2.940171446 | 6.570179191 | 22.08410621 | 5.12253031 | 11.52237016 | 2.105175562 | 0.031016157 | Up |
| Niben101Scf02241g00004 | 1.868445037 | 5.197011589 | 1.290374389 | 12.36127327 | 6.467516284 | 13.57786835 | 2.098950527 | 0.016003716 | Up |
| Niben101Scf09785g00011 | 3.153407768 | 3.759037915 | 0 | 0.941158184 | 11.22720864 | 13.25831652 | 2.070734625 | 0.044457398 | Up |
| Niben101Scf03252g04011 | 33.42207302 | 34.86085302 | 19.23479426 | 54.30870463 | 73.26945039 | 194.3008217 | 2.044239577 | 0.0046845 | Up |
| Niben101Scf00308g01003 | 2.850223499 | 1.486461094 | 0 | 5.210357218 | 4.069678231 | 6.990431109 | 2.041252035 | 0.035994776 | Up |
| Niben101Scf10259g00009 | 1.625445081 | 1.695418535 | 2.525749213 | 3.820369357 | 9.283536489 | 7.973102367 | 1.981816198 | 0.01808375 | Up |
| Niben101Scf01834g01011 | 11.8319988 | 18.51202816 | 4.902806747 | 46.34895202 | 38.70322274 | 41.91640266 | 1.981244266 | 2.31E-05 | Up |
| Niben101Scf00543g02005 | 4.712899267 | 5.672058353 | 3.379978838 | 9.467500743 | 28.9877154 | 10.66967264 | 1.965078174 | 0.000972285 | Up |
| Niben101Scf02050g01003 | 5.017821355 | 3.401991139 | 2.858936778 | 16.24902936 | 6.252805217 | 17.77628817 | 1.955398422 | 0.000332689 | Up |
| Niben101Scf04183g00005 | 3.618691605 | 3.774471921 | 1.666079503 | 17.64041866 | 3.340238742 | 11.39527832 | 1.943392174 | 0.009662784 | Up |
| Niben101Scf05858g00001 | 11.04273651 | 11.51811302 | 7.224886378 | 40.06983726 | 34.40142425 | 31.04285916 | 1.939437726 | 1.26E-08 | Up |
| Niben101Scf01125g03001 | 0.317388444 | 1.324206538 | 3.616683146 | 7.293975924 | 1.647933086 | 9.34108664 | 1.90984438 | 0.039732491 | Up |
| Niben101Scf00772g00003 | 12.15413451 | 11.34289691 | 8.614705919 | 14.03266852 | 59.78488601 | 35.5617512 | 1.909821002 | 0.000666349 | Up |
| Niben101Scf19315g00010 | 106.3370884 | 35.97235848 | 32.74932797 | 57.04100592 | 161.1592579 | 366.5316045 | 1.906733298 | 0.002524052 | Up |
| Niben101Scf00726g02003 | 3.871618507 | 0 | 1.604276476 | 8.088594934 | 4.824499457 | 6.330329876 | 1.896843765 | 0.045496204 | Up |
| Niben101Scf00530g06012 | 18.86325925 | 6.081456315 | 15.63267817 | 37.61784193 | 50.92939769 | 51.21735384 | 1.896173925 | 2.18E-06 | Up |
| Niben101Scf08127g08009 | 27.30885486 | 15.88556879 | 15.23297901 | 64.1854428 | 55.08076686 | 78.99902981 | 1.884151769 | 2.62E-07 | Up |
| Niben101Scf04430g03004 | 33.37434668 | 10.75978593 | 20.74391337 | 64.6548025 | 67.42365935 | 86.64906979 | 1.868313614 | 4.85E-06 | Up |
| Niben101Scf02749g03007 | 1.363103519 | 2.559210271 | 2.541721782 | 4.556478774 | 5.378868093 | 11.29236629 | 1.865345422 | 0.008515875 | Up |
| Niben101Scf05142g00021 | 40.13301308 | 41.86069097 | 4.891133397 | 83.84598991 | 102.9628592 | 97.78651475 | 1.851911405 | 0.003068883 | Up |
| Niben101Scf04626g01004 | 1.020083847 | 1.418662972 | 1.761210585 | 4.617516995 | 5.649539602 | 3.70644143 | 1.84544815 | 0.038965148 | Up |
| Niben101Scf00305g05031 | 12.78351651 | 6.666915754 | 5.793687425 | 16.69209639 | 38.16512107 | 27.86909449 | 1.840397452 | 0.003287515 | Up |
| Niben101Scf03934g02009 | 1.654505482 | 0.986131401 | 0.979392623 | 3.950396496 | 2.94530229 | 4.895153301 | 1.823505811 | 0.02619044 | Up |
| Niben101Scf07742g02002 | 3.558942928 | 9.651592952 | 4.424140761 | 23.04959226 | 15.52203908 | 17.84519841 | 1.80315254 | 0.007517836 | Up |
| Niben101Scf04445g04012 | 13.4731155 | 8.327772975 | 8.270864728 | 20.85041935 | 27.98185405 | 46.23445258 | 1.800589652 | 0.000259325 | Up |
| Niben101Scf08890g00002 | 10.20083847 | 27.66392795 | 27.47488513 | 23.44277859 | 120.758909 | 60.04435116 | 1.785757535 | 0.011021464 | Up |
| Niben101Scf00447g03001 | 4.476395032 | 8.404377207 | 5.100911128 | 24.78305319 | 6.972654124 | 24.88519836 | 1.782570808 | 0.003282655 | Up |
| Niben101Scf14996g00009 | 117.074696 | 61.30857501 | 96.32538221 | 435.3348216 | 269.6646313 | 169.1044992 | 1.744309296 | 4.23E-09 | Up |
| Niben101Scf07091g00005 | 3.38634392 | 4.238546337 | 5.61277603 | 29.00650808 | 9.142876845 | 4.429501315 | 1.742244173 | 0.035979689 | Up |
| Niben101Scf06603g03015 | 1.455978707 | 5.315298931 | 2.639488287 | 9.125502918 | 9.449601619 | 9.919221007 | 1.736419887 | 0.010658191 | Up |
| Niben101Scf03138g01010 | 89.11980608 | 96.67455868 | 108.1475566 | 503.2431299 | 177.157462 | 240.9175507 | 1.731957761 | 3.31E-09 | Up |
| Niben101Scf06085g00014 | 7.008675881 | 2.580137978 | 2.135422065 | 14.21187991 | 9.846759927 | 12.13370256 | 1.731868702 | 0.008857823 | Up |
| Niben101Scf00897g02016 | 0.44442918 | 2.781367924 | 5.064329067 | 6.035266498 | 6.922648537 | 12.1111421 | 1.730298112 | 0.042688156 | Up |
| Niben101Scf10252g00003 | 12.13726883 | 5.842967832 | 14.50759906 | 30.72123758 | 14.0580175 | 53.93814596 | 1.728033237 | 0.001341685 | Up |
| Niben101Scf01025g05008 | 1.275432853 | 1.330338701 | 1.585497319 | 7.460984892 | 3.443573888 | 2.224436987 | 1.724585442 | 0.038094669 | Up |
| Niben101Scf05035g02005 | 2.411483177 | 0.419215771 | 4.57986143 | 5.457916318 | 10.85137552 | 6.571534176 | 1.722635824 | 0.042349902 | Up |
| Niben101Scf02279g05002 | 37.77668931 | 27.72798799 | 51.21196116 | 97.43599071 | 123.9816179 | 132.6850243 | 1.717964494 | 1.37E-08 | Up |
| Niben101Scf04328g00046 | 17.86525225 | 3.882152051 | 9.253495617 | 23.32758066 | 33.23876086 | 37.32486694 | 1.715671367 | 0.004074797 | Up |
| Niben101Scf07599g00012 | 5.638573708 | 8.143348869 | 6.290434028 | 12.68628533 | 31.9788408 | 15.6020755 | 1.715622475 | 0.001710635 | Up |
| Niben101Scf00117g01002 | 6.710805412 | 2.333232502 | 2.317288242 | 9.930997113 | 13.35671609 | 10.97257179 | 1.705649043 | 0.024967793 | Up |
| Niben101Scf13522g01010 | 30.70518192 | 15.6798869 | 17.56074668 | 51.78722906 | 62.1098538 | 77.05046094 | 1.704240218 | 2.91E-07 | Up |
| Niben101Scf05407g00001 | 1.906161166 | 0.662739703 | 3.620159612 | 11.94706983 | 3.628937685 | 3.809285976 | 1.699542859 | 0.043045491 | Up |
| Niben101Scf01469g02007 | 2.845111907 | 2.967590549 | 2.456092811 | 4.45801111 | 8.863373822 | 10.85450251 | 1.691784572 | 0.036418076 | Up |
| Niben101Scf07109g04008 | 1.145770908 | 1.344481837 | 0.296732056 | 1.346482917 | 1.78470939 | 4.839628477 | 1.69037279 | 0.047406183 | Up |
| Niben101Scf07119g00007 | 1.169936873 | 1.83045187 | 4.241867902 | 5.49952875 | 10.0229332 | 6.05757171 | 1.684701907 | 0.019523258 | Up |
| Niben101Scf20124g00014 | 12.46840411 | 1.182286718 | 0.880655627 | 13.32052191 | 12.35907427 | 17.29771534 | 1.681352351 | 0.019064822 | Up |
| Niben101Scf20904g00009 | 4.573438652 | 2.862191807 | 5.211493611 | 16.24322683 | 8.073655937 | 13.46012669 | 1.678427323 | 0.010139334 | Up |
| Niben101Scf04375g10010 | 3.908757554 | 4.756529004 | 3.374303592 | 11.56876339 | 10.48570511 | 13.1371675 | 1.67371367 | 0.002481215 | Up |
| Niben101Scf17987g00003 | 59.59965298 | 38.14691704 | 25.25749213 | 58.01301616 | 91.42876845 | 199.3275592 | 1.664163052 | 0.000965181 | Up |
| Niben101Scf02952g02005 | 15.88249542 | 17.74951899 | 21.15387213 | 19.55353042 | 28.8625864 | 105.1119648 | 1.658022476 | 0.002431468 | Up |
| Niben101Scf05948g08009 | 3.498519198 | 2.146544845 | 1.065938163 | 10.53372447 | 2.77815934 | 6.281102736 | 1.643468829 | 0.01518276 | Up |
| Niben101Scf02151g04020 | 15.70966422 | 5.041829647 | 8.762908098 | 37.23883625 | 13.803674 | 34.24833192 | 1.632053093 | 0.004732042 | Up |
| Niben101Scf07850g08002 | 2.560747675 | 5.341969557 | 3.183278967 | 14.979777 | 11.16849196 | 5.582635955 | 1.618986385 | 0.030415513 | Up |
| Niben101Scf02246g01012 | 1.558451536 | 0.903078332 | 1.255669943 | 4.160343236 | 4.855042262 | 1.698774867 | 1.61730734 | 0.031399749 | Up |
| Niben101Scf04674g01003 | 13.5330505 | 12.23354775 | 13.08456068 | 53.7192367 | 35.6013526 | 21.63563518 | 1.602342405 | 0.003217792 | Up |
| Niben101Scf00332g12003 | 9.318811087 | 3.887989873 | 3.861421103 | 22.71369696 | 13.54774464 | 11.51226282 | 1.573826758 | 0.021207442 | Up |
| Niben101Scf15671g01009 | 7.671346226 | 6.667990369 | 6.622424329 | 11.35245511 | 25.22623244 | 20.20835029 | 1.569515088 | 0.011856914 | Up |
| Niben101Scf06263g01004 | 7.906870013 | 10.44651825 | 5.460595499 | 29.18365912 | 25.72703022 | 10.91715476 | 1.568460804 | 0.004827343 | Up |
| Niben101Scf02937g06005 | 6.235984275 | 9.431432039 | 5.813988755 | 27.03358498 | 18.13182427 | 13.93482112 | 1.565381806 | 0.000445527 | Up |
| Niben101Scf04090g02003 | 17.72616291 | 31.61065815 | 11.84703591 | 60.32883662 | 41.56516809 | 62.32977629 | 1.560388615 | 0.000122075 | Up |
| Niben101Scf05030g05008 | 1.865866578 | 3.11390382 | 10.43760872 | 15.59269223 | 10.07540211 | 16.67773096 | 1.557085141 | 0.016149527 | Up |
| Niben101Scf17339g00003 | 32.50890163 | 15.54133657 | 16.83832809 | 107.5363226 | 43.60448957 | 29.53000877 | 1.545860191 | 0.008707235 | Up |
| Niben101Scf01086g00013 | 30.82040793 | 30.22385327 | 26.46981597 | 70.44383974 | 75.4988022 | 87.29083144 | 1.540539888 | 3.57E-10 | Up |
| Niben101Scf11325g00011 | 11.49786187 | 8.700681294 | 10.7431443 | 11.30417005 | 29.49822707 | 40.30262042 | 1.539809383 | 0.000451707 | Up |
| Niben101Scf03154g04006 | 10.95161139 | 11.14445373 | 1.383537195 | 11.9981188 | 31.06637994 | 18.34329047 | 1.537298937 | 0.006268082 | Up |
| Niben101Scf04861g01011 | 13.6399783 | 5.836784797 | 11.23149151 | 40.55296244 | 11.25872535 | 31.64241998 | 1.535374407 | 0.001978741 | Up |
| Niben101Scf01940g00012 | 1.517634948 | 1.582967306 | 3.668350048 | 6.605513911 | 2.363943197 | 9.098557293 | 1.532066277 | 0.010358796 | Up |
| Niben101Scf07442g01010 | 6.848575209 | 4.365409965 | 0.78828704 | 9.538706811 | 8.692183052 | 13.27150663 | 1.529381474 | 0.030217333 | Up |
| Niben101Scf01083g05001 | 147.6504842 | 71.94471696 | 58.05562685 | 181.2553017 | 248.453856 | 299.5690998 | 1.526606366 | 1.58E-05 | Up |
| Niben101Scf00213g01002 | 25.87303577 | 4.787987529 | 6.052160012 | 24.41148845 | 29.46748497 | 42.75885613 | 1.523308142 | 0.005787482 | Up |
| Niben101Scf14470g00003 | 51.62320196 | 9.28371011 | 7.376215536 | 26.03307745 | 51.75870841 | 98.95998988 | 1.522598523 | 0.044927518 | Up |
| Niben101Scf11491g00006 | 4.974188125 | 1.383552249 | 2.061146515 | 8.31366888 | 7.231505164 | 6.867949196 | 1.512773944 | 0.034918515 | Up |
| Niben101Scf00568g04025 | 12.89453011 | 16.98899887 | 5.624301237 | 9.21607088 | 27.48495216 | 52.52339547 | 1.511660912 | 0.019004846 | Up |
| Niben101Scf01378g00004 | 28.6595971 | 26.74668896 | 16.14669291 | 86.66219873 | 47.51328697 | 54.25914491 | 1.50277751 | 2.02E-05 | Up |
| Niben101Scf07437g02002 | 32.21549999 | 22.40155898 | 48.20503312 | 14.95660045 | 110.2730983 | 136.5629647 | 1.499916226 | 0.01335244 | Up |
| Niben101Scf00496g00021 | 2.314672431 | 1.536383095 | 2.179834494 | 7.693348969 | 5.899824277 | 2.523086063 | 1.49898622 | 0.026836968 | Up |
| Niben101Scf06277g03006 | 3.55731784 | 4.385084469 | 4.355118779 | 9.121038387 | 5.708964798 | 16.56801079 | 1.491617519 | 0.01598935 | Up |
| Niben101Scf02972g03007 | 41.95208949 | 15.14702646 | 61.00982505 | 90.17467062 | 130.6932957 | 89.70010474 | 1.49004921 | 0.000464243 | Up |
| Niben101Scf06203g02014 | 9.619504309 | 5.574229103 | 2.583530756 | 13.02589304 | 15.53877143 | 17.08772049 | 1.489532791 | 0.007278541 | Up |
| Niben101Scf00709g07016 | 23.11522515 | 24.11030775 | 29.61686296 | 67.99059521 | 58.74568042 | 70.94811063 | 1.478716447 | 1.40E-05 | Up |
| Niben101Scf04328g00044 | 32.49053502 | 21.0346842 | 19.15003076 | 36.28031867 | 59.91624012 | 85.48687284 | 1.46513746 | 0.000374174 | Up |
| Niben101Scf19856g00003 | 36.72301851 | 27.35992874 | 24.45566699 | 65.76156071 | 81.71655495 | 77.19988006 | 1.464612702 | 0.015032139 | Up |
| Niben101Scf00929g03009 | 18.14764808 | 47.3222062 | 47.85335171 | 162.858341 | 62.53152017 | 67.43749922 | 1.455756826 | 0.000798883 | Up |
| Niben101Scf05756g00003 | 7.686213176 | 2.226970944 | 2.654103394 | 9.367199055 | 7.538193829 | 14.42926268 | 1.440702027 | 0.04317717 | Up |
| Niben101Scf00239g05006 | 1.534863003 | 3.001756887 | 2.186245772 | 7.415354007 | 4.582325392 | 4.810054447 | 1.432919824 | 0.018063661 | Up |
| Niben101Scf10630g02001 | 11.303519 | 9.976256974 | 6.905634116 | 24.2208613 | 21.67005514 | 23.85275452 | 1.427615131 | 1.52E-06 | Up |
| Niben101Scf07070g01015 | 3.024775777 | 2.839489859 | 3.760114753 | 7.583242816 | 9.737183149 | 6.594254551 | 1.423187046 | 0.022299787 | Up |
| Niben101Scf00304g05002 | 76.27088459 | 26.51808478 | 26.33687214 | 132.7877668 | 105.6029326 | 83.13833237 | 1.412034063 | 0.037594243 | Up |
| Niben101Scf11178g01001 | 23.84139391 | 19.01650492 | 29.056238 | 37.11296001 | 50.00082273 | 86.11735796 | 1.406078739 | 0.000377208 | Up |
| Niben101Scf01892g02013 | 4.937036513 | 5.14956999 | 5.540578496 | 7.735851644 | 12.81695343 | 17.04163328 | 1.405516251 | 0.020225382 | Up |
| Niben101Scf00304g06001 | 6.142454677 | 3.709246289 | 1.674499533 | 6.41641573 | 7.385663199 | 13.74344132 | 1.402517238 | 0.035785139 | Up |
| Niben101Scf02622g07005 | 4.001656277 | 6.492768739 | 5.987800078 | 12.07594579 | 16.16009001 | 11.63191018 | 1.394992593 | 0.017823633 | Up |
| Niben101Scf07024g00008 | 14.80766875 | 6.178048425 | 7.976579555 | 28.46132063 | 30.13847134 | 12.26712551 | 1.379326952 | 0.015848826 | Up |
| Niben101Scf15993g00010 | 37.78789477 | 23.13466717 | 27.23149663 | 105.5481222 | 65.68467408 | 44.77209283 | 1.377591957 | 0.000724035 | Up |
| Niben101Scf25021g00015 | 3.315117476 | 4.715221761 | 4.683000061 | 7.870399554 | 7.510968455 | 14.45444563 | 1.369348384 | 0.019305781 | Up |
| Niben101Scf04364g01014 | 8.656140076 | 5.745585035 | 9.782266795 | 12.33029263 | 25.33213203 | 19.72885824 | 1.367827604 | 0.039922599 | Up |
| Niben101Scf01974g00019 | 4.193588156 | 6.561175615 | 5.15876877 | 13.41567129 | 12.79210781 | 11.42794947 | 1.360258309 | 0.003603225 | Up |
| Niben101Scf36713g00003 | 44.27354568 | 11.81335241 | 12.79922758 | 33.34172588 | 68.42806844 | 59.483189 | 1.353307264 | 0.01756981 | Up |
| Niben101Scf00712g14003 | 4.262775149 | 5.335538983 | 6.771044514 | 11.28068045 | 13.87003263 | 13.32024299 | 1.352559181 | 0.005654753 | Up |
| Niben101Scf03110g05008 | 1334.669332 | 1229.083545 | 1495.673917 | 4390.320315 | 2223.498313 | 3070.999707 | 1.352181089 | 2.10E-10 | Up |
| Niben101Scf03917g00014 | 5.372201294 | 4.872580948 | 2.419641963 | 12.68756613 | 8.246730775 | 8.91117579 | 1.348671829 | 0.008888666 | Up |
| Niben101Scf01267g01006 | 6.605250553 | 10.71715343 | 17.86657536 | 29.89936245 | 29.72280911 | 23.59996334 | 1.34469685 | 0.001825078 | Up |
| Niben101Scf08680g02003 | 26.33523239 | 21.97514595 | 13.64061107 | 46.7666876 | 58.79685189 | 37.31840152 | 1.321476296 | 0.015118503 | Up |
| Niben101Scf02902g02003 | 112.7119073 | 83.54803398 | 200.9231313 | 251.6148117 | 269.7353612 | 394.1514938 | 1.321357702 | 2.40E-05 | Up |
| Niben101Scf02363g00015 | 14.44788471 | 23.3434912 | 15.84727221 | 75.75731794 | 29.41795978 | 20.68956786 | 1.310707567 | 0.001166437 | Up |
| Niben101Scf00648g00003 | 28.61106815 | 8.23248005 | 11.24230661 | 40.1930733 | 20.49012124 | 49.46937588 | 1.310403102 | 0.033265895 | Up |
| Niben101Scf03166g00008 | 6.330544292 | 16.5076665 | 19.67383266 | 15.70562414 | 19.72153728 | 58.65465748 | 1.307276236 | 0.042070946 | Up |
| Niben101Scf01173g00005 | 22.04080819 | 19.04855756 | 17.61367187 | 54.92834076 | 45.77580277 | 34.32195366 | 1.304501997 | 1.54E-05 | Up |
| Niben101Scf09552g00003 | 130.7794172 | 110.8905645 | 136.8595738 | 391.7149762 | 225.8808352 | 254.5621886 | 1.300042627 | 7.10E-09 | Up |
| Niben101Scf00109g09010 | 8.470829898 | 11.5541009 | 13.95017674 | 33.12567554 | 13.53290592 | 30.77848449 | 1.299564857 | 0.000839482 | Up |
| Niben101Scf07824g00009 | 76.25177866 | 55.69993508 | 72.04374844 | 205.2289488 | 143.1472617 | 119.6675496 | 1.290267275 | 1.08E-08 | Up |
| Niben101Scf01681g14014 | 10.96469273 | 45.74683819 | 29.20771602 | 114.5373155 | 58.55707634 | 22.19649 | 1.269149263 | 0.04604375 | Up |
| Niben101Scf03797g00003 | 10.0416656 | 20.17204648 | 7.320188393 | 26.41809134 | 23.94485099 | 30.81045476 | 1.254752882 | 0.003782061 | Up |
| Niben101Scf01157g00004 | 8.358872538 | 17.85260063 | 6.597434049 | 34.51095955 | 7.853449721 | 29.07004717 | 1.251732219 | 0.023301493 | Up |
| Niben101Scf02511g05005 | 89.2416319 | 85.73468906 | 128.4530723 | 199.6911628 | 192.6590687 | 270.3275762 | 1.247637421 | 1.19E-06 | Up |
| Niben101Scf01984g00024 | 5.275921424 | 2.568086961 | 5.46543817 | 10.28763685 | 12.78361147 | 6.517762134 | 1.246390459 | 0.045288249 | Up |
| Niben101Scf16613g04012 | 5.573641566 | 9.791292841 | 3.038869862 | 11.64446571 | 18.58205448 | 9.273121688 | 1.23453315 | 0.021452352 | Up |
| Niben101Scf04033g03001 | 9.884326476 | 11.59856418 | 10.23938207 | 30.33021515 | 25.66052567 | 13.46789185 | 1.228395274 | 0.021294498 | Up |
| Niben101Scf00820g00001 | 11.66495882 | 6.952640715 | 17.26282376 | 26.98158153 | 28.55272567 | 22.70584708 | 1.222926463 | 0.036408004 | Up |
| Niben101Scf17372g01008 | 13.31289813 | 15.09348083 | 5.396521962 | 23.58087488 | 24.04269918 | 23.97567787 | 1.213395401 | 0.019704151 | Up |
| Niben101Scf00058g02009 | 4.689430681 | 2.139945949 | 10.32299511 | 21.73747126 | 8.521903809 | 7.986981384 | 1.212336943 | 0.049079725 | Up |
| Niben101Scf00448g04005 | 35.11638645 | 33.18075358 | 35.5218563 | 98.82729546 | 44.617239 | 79.70887616 | 1.210268668 | 0.000127848 | Up |
| Niben101Scf10889g01017 | 61.94462308 | 39.5318921 | 53.19333732 | 183.0539128 | 44.43526601 | 107.9465647 | 1.202491046 | 0.001194966 | Up |
| Niben101Scf01413g00010 | 4.475476609 | 5.516893304 | 7.586575397 | 8.5001607 | 14.78744388 | 13.7483578 | 1.201734642 | 0.041049853 | Up |
| Niben101Scf04144g01003 | 16.14501894 | 18.29735394 | 9.327384497 | 44.10874058 | 26.1155209 | 23.35214784 | 1.201447777 | 0.000107074 | Up |
| Niben101Scf00073g03006 | 12.81378052 | 7.374012879 | 8.696801362 | 25.3858966 | 15.60043322 | 20.22884558 | 1.186896179 | 0.014478413 | Up |
| Niben101Scf07703g01002 | 18.82251469 | 10.13305873 | 3.773930239 | 27.27312737 | 23.95951409 | 17.86990488 | 1.186795019 | 0.042702074 | Up |
| Niben101Scf04950g04015 | 28.18278164 | 8.017095398 | 22.11752828 | 33.45428234 | 50.55024097 | 39.09864727 | 1.183432452 | 0.006545616 | Up |
| Niben101Scf09987g00007 | 40.22770492 | 16.21160923 | 17.99504127 | 33.42651945 | 61.23655529 | 58.79861773 | 1.172593831 | 0.004849462 | Up |
| Niben101Scf13950g01012 | 8.723063047 | 13.86450348 | 14.2000647 | 36.01457907 | 18.97932889 | 21.73369057 | 1.161132625 | 0.008044396 | Up |
| Niben101Scf00360g03014 | 9.594402174 | 13.1347514 | 5.590711897 | 22.23703213 | 14.63336675 | 20.91656865 | 1.156977527 | 0.007705855 | Up |
| Niben101Scf02575g01001 | 8.246819895 | 13.23359317 | 7.228738418 | 18.55460542 | 26.35005995 | 13.82979297 | 1.155185254 | 0.045698826 | Up |
| Niben101Scf07278g00012 | 10.28122667 | 5.147434125 | 12.35462563 | 15.89487744 | 26.47738396 | 15.24145289 | 1.154821071 | 0.024666366 | Up |
| Niben101Scf01105g01020 | 3.960804925 | 4.131312808 | 8.548085997 | 14.13632751 | 9.25431824 | 11.15337814 | 1.151050447 | 0.040156117 | Up |
| Niben101Scf11689g01011 | 37.56106092 | 40.59409235 | 40.78548935 | 79.89084173 | 69.08051259 | 93.23180404 | 1.148350354 | 3.62E-05 | Up |
| Niben101Scf03584g05009 | 7.802341042 | 9.765866915 | 5.172870071 | 15.32262994 | 16.204416 | 14.62836884 | 1.146835426 | 0.011985446 | Up |
| Niben101Scf11812g00025 | 6.794345589 | 9.449111981 | 11.73067626 | 26.0237332 | 12.22948534 | 19.25588603 | 1.142684484 | 0.026135943 | Up |
| Niben101Scf04436g07003 | 188.1522027 | 213.194541 | 224.3577913 | 552.8684386 | 332.4329858 | 399.8584914 | 1.142312483 | 8.63E-08 | Up |
| Niben101Scf03930g02028 | 161.844765 | 83.47845522 | 96.72600127 | 230.3718889 | 209.6194533 | 254.9326981 | 1.138332264 | 7.91E-05 | Up |
| Niben101Scf00927g04014 | 9.082639692 | 10.10521215 | 10.34978762 | 36.36965705 | 12.26122599 | 12.87057542 | 1.136517715 | 0.014995952 | Up |
| Niben101Scf01994g02009 | 91.86620923 | 125.5584717 | 87.50909593 | 163.2483472 | 269.7429539 | 179.5575485 | 1.134715975 | 0.000121155 | Up |
| Niben101Scf09709g00008 | 14.43424356 | 18.52999429 | 9.201684331 | 23.77689128 | 29.40148836 | 30.25751178 | 1.119968508 | 0.01544655 | Up |
| Niben101Scf04738g05019 | 16.5571991 | 12.62036019 | 9.895356584 | 24.61306969 | 25.79031156 | 27.0720196 | 1.10843018 | 0.024726353 | Up |
| Niben101Scf02819g03010 | 13.74176919 | 10.47436078 | 22.44811223 | 44.16821242 | 20.85601626 | 29.3820439 | 1.104812858 | 0.018392743 | Up |
| Niben101Scf02909g10007 | 23.82033633 | 10.20451396 | 22.03213242 | 42.21181262 | 22.5272665 | 46.82995728 | 1.09952787 | 0.010885613 | Up |
| Niben101Scf18356g00003 | 15.55618341 | 17.38484826 | 21.10294761 | 59.97026899 | 11.53860955 | 36.33614078 | 1.086865249 | 0.019724518 | Up |
| Niben101Scf06704g00002 | 260.9267104 | 116.1212975 | 86.49583271 | 109.0257454 | 256.5039651 | 508.1648246 | 1.077833284 | 0.044679894 | Up |
| Niben101Scf00980g01002 | 473.5912801 | 459.1254924 | 450.6626281 | 905.5213481 | 927.5332102 | 855.9530448 | 1.074603039 | 1.78E-11 | Up |
| Niben101Scf14939g01014 | 309.3084562 | 281.9189392 | 343.6270759 | 843.241033 | 378.9813696 | 603.4194707 | 1.064052881 | 1.49E-05 | Up |
| Niben101Scf00279g02022 | 8.073653157 | 9.624244805 | 10.35501681 | 21.28517364 | 14.77171691 | 18.02028996 | 1.057552854 | 0.020625954 | Up |
| Niben101Scf12017g03006 | 31.21011984 | 32.05285211 | 36.31044793 | 76.23882632 | 52.35399622 | 63.3300711 | 1.055015681 | 0.000460911 | Up |
| Niben101Scf02665g04014 | 5.302254009 | 8.295764489 | 4.8824148 | 13.53914485 | 12.84741559 | 8.990598035 | 1.052935311 | 0.034088173 | Up |
| Niben101Scf06093g00001 | 14.44994899 | 11.52564851 | 7.044238412 | 36.40422446 | 13.68130577 | 14.3612293 | 1.052595542 | 0.039689316 | Up |
| Niben101Scf13415g00021 | 5.568505284 | 7.516523534 | 8.143809819 | 16.76626511 | 11.0548164 | 12.8538948 | 1.045746703 | 0.004449929 | Up |
| Niben101Scf00332g12011 | 10.19996399 | 7.979295119 | 24.65483444 | 40.84376403 | 24.27328443 | 18.53061845 | 1.036061591 | 0.035724516 | Up |
| Niben101Scf16098g00019 | 19.16768299 | 12.1990141 | 15.14456442 | 29.52482915 | 27.32631585 | 31.16325434 | 1.033441189 | 0.003661172 | Up |
| Niben101Scf03428g00016 | 5.575566071 | 9.369557602 | 8.984649915 | 12.29562452 | 14.47462876 | 17.89512996 | 1.031987734 | 0.027658908 | Up |
| Niben101Scf05438g03003 | 94.48060875 | 85.95565542 | 88.08700804 | 153.5248718 | 171.6956096 | 179.084105 | 1.03069446 | 5.73E-06 | Up |
| Niben101Scf06112g02014 | 16.59858739 | 8.147358395 | 30.84954152 | 49.97684341 | 19.26434589 | 37.25055759 | 1.019109947 | 0.041777204 | Up |
| Niben101Scf01063g04003 | 74.61910582 | 54.87391447 | 46.71336932 | 145.2397653 | 95.32565744 | 89.5301262 | 1.00630885 | 0.000354826 | Up |
| Niben101Scf05038g00009 | 5.71207777 | 14.39844161 | 14.7931543 | 20.88395219 | 16.80622762 | 26.46217684 | 1.006063863 | 0.048729696 | Up |
| Niben101Scf05565g02013 | 241.2525574 | 175.1328059 | 173.9360272 | 498.4866969 | 301.9142664 | 307.2857971 | 1.00556754 | 3.18E-05 | Up |
| Niben101Scf04529g00012 | 462.0355288 | 401.0183841 | 492.6070065 | 708.1110913 | 770.4703752 | 1010.95081 | 1.002094845 | 0.000191953 | Up |
| Niben101Ctg14347g00004 | 3.208807442 | 5.020414108 | 3.324071241 | 0 | 0 | 0 | -4.500556418 | 0.028351486 | Down |
| Niben101Scf00024g02014 | 14.10488962 | 20.16100966 | 12.44687793 | 5.457031513 | 2.169923272 | 3.416643796 | -1.968644115 | 0.003604282 | Down |
| Niben101Scf00050g03006 | 9.239571342 | 9.637323763 | 1.794649994 | 0 | 0 | 0 | -5.802774376 | 0.000439263 | Down |
| Niben101Scf00051g03003 | 10.04303545 | 35.23535574 | 17.02438696 | 5.722345753 | 4.740463132 | 5.971261441 | -1.786511133 | 0.022000471 | Down |
| Niben101Scf00130g05001 | 18.82147549 | 14.96516158 | 15.66197687 | 6.768519124 | 9.612216515 | 4.035966968 | -1.170794162 | 0.001684058 | Down |
| Niben101Scf00165g00014 | 0.366415927 | 2.293138151 | 2.277467879 | 0 | 0 | 0 | -4.40939855 | 0.040632076 | Down |
| Niben101Scf00173g04002 | 30.23699618 | 37.23314317 | 20.44705067 | 12.28329025 | 17.00784206 | 7.782114127 | -1.126297483 | 0.009848462 | Down |
| Niben101Scf00176g09013 | 14.23577171 | 49.00039499 | 16.22184946 | 10.40949328 | 11.08717077 | 1.551756383 | -1.668911935 | 0.018658632 | Down |
| Niben101Scf00222g00006 | 12.76637124 | 22.63711185 | 20.27826121 | 9.335036998 | 6.186609568 | 6.030205224 | -1.260743004 | 0.014964179 | Down |
| Niben101Scf00229g02007 | 31.64430318 | 38.50764438 | 21.12553361 | 12.48770062 | 10.95349566 | 16.8635199 | -1.0443632 | 0.007892579 | Down |
| Niben101Scf00270g12006 | 82.22839824 | 58.84099621 | 43.58155505 | 32.96004935 | 15.88626565 | 18.76024086 | -1.348222504 | 0.00363952 | Down |
| Niben101Scf00298g02018 | 3.934609126 | 5.745585035 | 18.74934469 | 0 | 2.451496649 | 2.573329335 | -2.377659533 | 0.046886476 | Down |
| Niben101Scf00317g06017 | 4.50862372 | 2.743250149 | 2.724504014 | 0 | 0.780317236 | 0 | -3.546531366 | 0.023296971 | Down |
| Niben101Scf00331g02008 | 30.04610605 | 25.07164379 | 17.11896689 | 3.138619943 | 6.240173287 | 1.637573213 | -2.594266386 | 0.008578853 | Down |
| Niben101Scf00388g06006 | 15.50353447 | 11.02564292 | 8.030219011 | 5.152958116 | 0 | 0.768158011 | -2.475448224 | 0.018946104 | Down |
| Niben101Scf00417g00008 | 1.039875721 | 4.880885032 | 9.156447944 | 0.54312773 | 0 | 0.566753183 | -3.671745248 | 0.018310358 | Down |
| Niben101Scf00465g07001 | 10.51339067 | 7.940881694 | 7.13551088 | 3.787000297 | 2.635246854 | 2.766211425 | -1.370162797 | 0.04361526 | Down |
| Niben101Scf00471g03008 | 87.5702749 | 39.77712717 | 55.60006341 | 26.55755337 | 35.20097752 | 10.77719123 | -1.241381181 | 0.029192849 | Down |
| Niben101Scf00535g00010 | 7.816047858 | 11.64645615 | 5.78343476 | 1.166379033 | 1.159491658 | 0 | -3.320637239 | 0.036374803 | Down |
| Niben101Scf00592g01002 | 14.82900951 | 24.95872765 | 6.284325031 | 5.9849279 | 8.049441749 | 0.734737132 | -1.526647784 | 0.023781832 | Down |
| Niben101Scf00597g05012 | 3.040544311 | 3.171436082 | 10.70919732 | 0.635231267 | 1.578700694 | 1.657157806 | -2.018807526 | 0.02688938 | Down |
| Niben101Scf00646g01003 | 16.11411274 | 28.88841638 | 14.08467565 | 12.09859084 | 6.79795414 | 6.037979446 | -1.131946003 | 0.040651181 | Down |
| Niben101Scf00661g01003 | 4.271958206 | 8.020549553 | 4.425411519 | 0.446249281 | 1.774456859 | 0 | -2.781186182 | 0.017572623 | Down |
| Niben101Scf00711g04005 | 32.63135784 | 25.83462898 | 22.39991703 | 18.07008786 | 8.573433957 | 7.71386589 | -1.142538672 | 0.009336032 | Down |
| Niben101Scf00739g04033 | 2.424257945 | 6.95370316 | 0.941752457 | 0 | 0.314678665 | 0.990952006 | -2.797450576 | 0.034552262 | Down |
| Niben101Scf00793g01001 | 38.24359726 | 39.01001297 | 35.53909179 | 4.993663608 | 4.672166046 | 5.517404928 | -2.776185607 | 6.87E-14 | Down |
| Niben101Scf00894g01011 | 147.6641743 | 136.8068342 | 77.38402905 | 62.60742541 | 49.60978763 | 34.55903523 | -1.193680595 | 3.61E-05 | Down |
| Niben101Scf00920g01006 | 31.23971848 | 38.25142914 | 27.20274191 | 3.783541849 | 14.10450127 | 6.90921301 | -1.827734916 | 0.000245497 | Down |
| Niben101Scf00938g01015 | 47.36081123 | 25.4965869 | 26.90500189 | 11.17135912 | 3.172969468 | 3.330657383 | -2.411628712 | 0.004677754 | Down |
| Niben101Scf00966g01002 | 113.8371412 | 121.1124469 | 56.60462072 | 29.72860451 | 37.82791614 | 58.32091973 | -1.064469645 | 0.0136192 | Down |
| Niben101Scf01002g02011 | 4.732799521 | 8.227568069 | 8.171344578 | 0 | 0.819115825 | 0 | -4.441845933 | 0.007620531 | Down |
| Niben101Scf01013g04008 | 22.45357817 | 15.61345178 | 16.24517347 | 7.446043 | 7.031970976 | 8.158434485 | -1.147381434 | 0.014380594 | Down |
| Niben101Scf01022g03042 | 12.70578096 | 17.67033271 | 20.4745119 | 6.390450667 | 6.841385996 | 2.564780069 | -1.587097527 | 0.008152712 | Down |
| Niben101Scf01051g02003 | 5.519952677 | 2.878789997 | 1.429558822 | 0 | 0 | 0 | -4.489917401 | 0.031501779 | Down |
| Niben101Scf01060g01024 | 7.996141126 | 0.641566567 | 0.63718239 | 0 | 0 | 0 | -4.586270448 | 0.034522988 | Down |
| Niben101Scf01063g00004 | 6.448113805 | 4.656252004 | 10.79034431 | 1.036262713 | 2.060287328 | 1.08133899 | -2.286726715 | 0.020160981 | Down |
| Niben101Scf01063g05019 | 11.09616387 | 12.40054324 | 9.031589247 | 1.655866637 | 1.234566658 | 0.863947499 | -3.002512726 | 0.000164585 | Down |
| Niben101Scf01076g05001 | 15.82888729 | 11.22700524 | 13.11798229 | 1.984185022 | 3.287447613 | 2.760659823 | -2.205368224 | 0.006036514 | Down |
| Niben101Scf01157g02001 | 3.779624522 | 12.48405389 | 7.178219916 | 0.658033406 | 0 | 3.433285644 | -2.355714289 | 0.047410793 | Down |
| Niben101Scf01157g02022 | 9.830949713 | 22.33942057 | 4.728326549 | 4.034415862 | 4.010592959 | 1.148156856 | -1.879275233 | 0.008576057 | Down |
| Niben101Scf01189g03003 | 3.699707088 | 5.466881283 | 5.11013937 | 0.644119764 | 0 | 0.33606913 | -3.764418732 | 0.001946396 | Down |
| Niben101Scf01220g00010 | 71.8026147 | 90.88215873 | 70.20308635 | 48.03697407 | 42.72665436 | 8.794127916 | -1.137902923 | 0.012172587 | Down |
| Niben101Scf01256g00011 | 3.470325249 | 9.307847757 | 2.567845034 | 0 | 2.059257185 | 0 | -2.739538711 | 0.048693672 | Down |
| Niben101Scf01276g05013 | 4.406762221 | 5.975408436 | 9.586621459 | 2.301654625 | 0.915225415 | 0.480354809 | -2.353590372 | 0.018162869 | Down |
| Niben101Scf01305g01003 | 2.531544254 | 3.080611551 | 1.748320023 | 0.440742375 | 0 | 0 | -3.814637411 | 0.039165674 | Down |
| Niben101Scf01326g10014 | 36.93199585 | 22.47109305 | 14.08130231 | 9.644802102 | 5.326583509 | 13.9782504 | -1.21206215 | 0.007721883 | Down |
| Niben101Scf01376g04029 | 11.75484884 | 9.195660696 | 0 | 1.227912959 | 0 | 1.28132581 | -2.929708129 | 0.040444839 | Down |
| Niben101Scf01382g03004 | 2.678983337 | 5.588620689 | 3.700287049 | 0 | 0.618209902 | 0.648933246 | -3.093090029 | 0.008940192 | Down |
| Niben101Scf01396g05008 | 5.497347024 | 2.085091343 | 1.553132077 | 0.52204868 | 0 | 0 | -3.894350322 | 0.035743608 | Down |
| Niben101Scf01415g03009 | 23.84611591 | 36.31408723 | 28.16107108 | 8.46929191 | 9.409785115 | 9.877425732 | -1.544442786 | 0.000634991 | Down |
| Niben101Scf01430g01004 | 37.2630629 | 30.41780313 | 21.81829114 | 10.15435864 | 6.729598643 | 7.064041313 | -1.791700055 | 0.002464867 | Down |
| Niben101Scf01438g05003 | 9.316688351 | 14.42940205 | 11.69861063 | 5.013570012 | 7.03618628 | 3.692932759 | -1.053549223 | 0.040236467 | Down |
| Niben101Scf01494g06004 | 2.520817372 | 5.696893636 | 5.222735662 | 0 | 1.745133207 | 0.45796539 | -2.469191788 | 0.046729897 | Down |
| Niben101Scf01550g00008 | 26.65380375 | 27.80121791 | 28.7156864 | 11.13703851 | 8.857020149 | 8.135041125 | -1.456134095 | 0.024683381 | Down |
| Niben101Scf01557g03005 | 43.30995398 | 53.34423281 | 40.57004235 | 21.65822777 | 18.18117403 | 17.57803961 | -1.14087393 | 0.000880593 | Down |
| Niben101Scf01596g01023 | 1.289029511 | 4.571370309 | 1.602399397 | 0.538608727 | 0.535428285 | 0 | -2.673487458 | 0.044285879 | Down |
| Niben101Scf01596g12004 | 2.436170761 | 5.505597454 | 5.88858812 | 0 | 0.42163333 | 0.442587355 | -3.873237973 | 0.007349461 | Down |
| Niben101Scf01623g01025 | 3.908757554 | 13.59008287 | 11.69758579 | 4.083092962 | 3.156986486 | 0.473411441 | -1.82761361 | 0.029287806 | Down |
| Niben101Scf01641g01015 | 17.14269959 | 21.39294706 | 11.09905232 | 6.715231925 | 9.536541455 | 3.336827172 | -1.224259714 | 0.014847974 | Down |
| Niben101Scf01697g02003 | 0.643636157 | 1.007015878 | 2.667025027 | 0 | 0 | 0 | -4.428008662 | 0.037317443 | Down |
| Niben101Scf01734g00007 | 2.503842171 | 4.570351732 | 4.539120009 | 0 | 0 | 0.682322172 | -3.911607438 | 0.031213949 | Down |
| Niben101Scf01739g08021 | 16.20756298 | 0.994428179 | 4.938163526 | 0 | 0.990027493 | 1.039229155 | -3.331032436 | 0.045549255 | Down |
| Niben101Scf01752g09018 | 0.864824684 | 0.902054345 | 1.343835168 | 0 | 0 | 0 | -4.516586203 | 0.027377477 | Down |
| Niben101Scf01757g00009 | 0.466818032 | 2.43456993 | 2.176139859 | 0 | 0 | 0 | -5.097943731 | 0.006061534 | Down |
| Niben101Scf01775g01019 | 3.602257946 | 3.287664461 | 0.699685295 | 0.70554808 | 0.233793958 | 0.490825759 | -2.287185713 | 0.049137093 | Down |
| Niben101Scf01922g05005 | 7.123638974 | 12.5386364 | 6.91830723 | 2.325425643 | 0.924677676 | 1.455947446 | -2.381455236 | 0.005821831 | Down |
| Niben101Scf01927g06013 | 7.228589305 | 16.96448558 | 4.992165314 | 0.629249442 | 0.625533774 | 1.313242188 | -3.361531194 | 0.003073882 | Down |
| Niben101Scf01936g06010 | 25.76719074 | 33.32678222 | 12.27867688 | 6.998274198 | 9.632699929 | 1.685236467 | -1.846766941 | 0.002999815 | Down |
| Niben101Scf01945g01009 | 30.68226139 | 48.0046437 | 25.92937982 | 4.217201064 | 16.76919532 | 13.20193389 | -1.462490503 | 0.013325246 | Down |
| Niben101Scf01970g01013 | 13.87420257 | 25.91402818 | 8.690396469 | 6.74093447 | 8.041355749 | 2.813663055 | -1.339380775 | 0.016063676 | Down |
| Niben101Scf01978g01007 | 1.904330665 | 3.972619614 | 1.972736261 | 0 | 0 | 0 | -4.273421723 | 0.04907011 | Down |
| Niben101Scf01991g03021 | 2.820027018 | 5.882851572 | 8.179711142 | 0 | 0 | 0 | -5.571168401 | 0.000914736 | Down |
| Niben101Scf02030g01004 | 14.57354435 | 15.74380781 | 8.357290923 | 8.427318115 | 5.945361951 | 3.4040892 | -1.016997873 | 0.040240345 | Down |
| Niben101Scf02111g16018 | 141.6459285 | 200.699911 | 142.756273 | 65.51396448 | 95.6969776 | 51.62160655 | -1.068714762 | 3.41E-05 | Down |
| Niben101Scf02151g00001 | 2.331620223 | 3.647990498 | 3.019218147 | 0.30445167 | 0.907961722 | 0.31769498 | -2.429745987 | 0.039649233 | Down |
| Niben101Scf02280g01009 | 7.133248199 | 9.300407431 | 7.389482111 | 0.931424983 | 1.851849986 | 0.971940936 | -2.541622282 | 0.045247642 | Down |
| Niben101Scf02312g04002 | 2.209518662 | 4.60927156 | 0.572221735 | 0 | 0 | 0 | -4.370093884 | 0.04473929 | Down |
| Niben101Scf02346g01001 | 3.785878196 | 4.738626833 | 3.921870994 | 0 | 1.179414195 | 0.825351906 | -2.490831357 | 0.036408553 | Down |
| Niben101Scf02426g01007 | 1.114382129 | 3.19647608 | 4.906250696 | 0 | 0.28930278 | 0.911041012 | -2.802544923 | 0.03011357 | Down |
| Niben101Scf02623g00007 | 49.89419232 | 94.65371091 | 44.05488947 | 15.04120804 | 16.69104101 | 6.205191305 | -2.19630086 | 8.57E-09 | Down |
| Niben101Scf02730g01032 | 5.292819393 | 9.201114825 | 14.01196578 | 0 | 0 | 0 | -6.268930516 | 3.52E-05 | Down |
| Niben101Scf02840g04002 | 33.13908756 | 63.60086108 | 46.00150194 | 12.46216742 | 24.08890423 | 13.00425787 | -1.398003448 | 0.00209033 | Down |
| Niben101Scf02891g04009 | 24.79578617 | 31.03585789 | 22.79674866 | 3.237713602 | 11.26508307 | 4.72997077 | -1.899512388 | 6.07E-05 | Down |
| Niben101Scf02982g01007 | 2.182365737 | 1.138156977 | 1.507172434 | 0.189975162 | 0.188853374 | 0.19823887 | -2.957478495 | 0.029307082 | Down |
| Niben101Scf03000g01002 | 58.02186061 | 63.02636216 | 28.45257655 | 15.7800421 | 26.38245008 | 20.58307052 | -1.115150884 | 0.001998906 | Down |
| Niben101Scf03027g01002 | 10.43706842 | 11.2895706 | 7.207986059 | 6.056985855 | 0 | 2.528183207 | -1.665206351 | 0.046198972 | Down |
| Niben101Scf03104g03021 | 2.13383393 | 5.193283461 | 5.157794903 | 0 | 0 | 0 | -4.792722911 | 0.013482881 | Down |
| Niben101Scf03113g02002 | 18.42354138 | 21.83710529 | 10.41018257 | 0.874784275 | 3.478474974 | 2.738509259 | -2.695108066 | 0.003112148 | Down |
| Niben101Scf03114g09011 | 17.93871134 | 33.16941361 | 14.35965973 | 2.555290908 | 12.7010106 | 5.332886452 | -1.520716299 | 0.039197811 | Down |
| Niben101Scf03147g07006 | 51.50056997 | 80.29368698 | 35.37982222 | 14.15725234 | 40.53212611 | 9.454769346 | -1.251676714 | 0.009383992 | Down |
| Niben101Scf03221g00006 | 24.85708495 | 53.77483487 | 17.16665204 | 9.61694133 | 15.2962465 | 4.014107041 | -1.598240463 | 0.0172403 | Down |
| Niben101Scf03264g05003 | 13.63296005 | 18.83168339 | 23.66501555 | 9.622301944 | 9.1828637 | 6.024516839 | -1.074271178 | 0.024028846 | Down |
| Niben101Scf03426g02006 | 45.85194951 | 42.88606459 | 44.37700058 | 19.78843316 | 18.33033968 | 13.6097053 | -1.257593215 | 2.10E-06 | Down |
| Niben101Scf03468g03027 | 24.4414792 | 47.56279002 | 22.29622619 | 17.14808909 | 14.39510173 | 10.33876245 | -1.050344647 | 0.009648733 | Down |
| Niben101Scf03504g06013 | 14.5970995 | 15.78939399 | 11.20106885 | 8.471193413 | 4.210585847 | 4.125184431 | -1.205409081 | 0.012551793 | Down |
| Niben101Scf03548g02027 | 11.23704652 | 27.14287711 | 28.48906509 | 7.722521483 | 12.5901498 | 8.703118003 | -1.082314596 | 0.017200215 | Down |
| Niben101Scf03565g00006 | 124.0533748 | 19.83407437 | 18.76051166 | 36.88953303 | 10.34330093 | 9.8703043 | -1.446147014 | 0.03749578 | Down |
| Niben101Scf03595g19030 | 21.26518979 | 28.05983389 | 26.80644428 | 13.11407868 | 11.70637159 | 7.540453401 | -1.129004369 | 0.00151183 | Down |
| Niben101Scf03634g01017 | 2.824847577 | 5.401832084 | 0 | 0 | 0 | 0 | -4.748311656 | 0.028170096 | Down |
| Niben101Scf03638g00009 | 45.99290667 | 37.37419392 | 23.82251056 | 18.9942372 | 11.10710456 | 16.9056911 | -1.072483757 | 0.014154977 | Down |
| Niben101Scf03733g01006 | 14.72192279 | 10.74897868 | 11.43806251 | 8.842659751 | 3.057545931 | 3.209497612 | -1.204754926 | 0.045934463 | Down |
| Niben101Scf03737g06014 | 1.875217966 | 2.933915763 | 1.942577803 | 0 | 0 | 0 | -4.500556418 | 0.028351486 | Down |
| Niben101Scf03790g00014 | 5.204837269 | 19.9059639 | 3.59453373 | 2.718489715 | 0.900812417 | 0.945580333 | -2.522864545 | 0.041531288 | Down |
| Niben101Scf03817g12026 | 3.611713198 | 5.76158945 | 4.621790933 | 1.331576492 | 1.323713639 | 0 | -2.30150841 | 0.008090441 | Down |
| Niben101Scf03870g01004 | 85.36796482 | 110.2825564 | 112.7742369 | 0.818123682 | 1.626585454 | 4.26855577 | -5.414239785 | 2.99E-18 | Down |
| Niben101Scf03944g02014 | 31.66535727 | 48.51062814 | 29.7275473 | 18.60619008 | 18.49632202 | 7.550487272 | -1.189428313 | 0.035133068 | Down |
| Niben101Scf04007g02013 | 42.54052639 | 32.08425703 | 13.89856718 | 2.392809264 | 12.91283383 | 15.6947611 | -1.34659277 | 0.015068106 | Down |
| Niben101Scf04053g02013 | 58.95149317 | 91.12267384 | 72.84144938 | 31.9033073 | 39.09048381 | 17.80684913 | -1.216686394 | 0.001148633 | Down |
| Niben101Scf04077g03006 | 83.15986771 | 78.95545887 | 45.83465329 | 23.38778087 | 42.07084571 | 24.40512337 | -1.083012419 | 0.002718462 | Down |
| Niben101Scf04103g07018 | 1.034451226 | 2.15796621 | 3.750634374 | 0 | 0 | 0 | -4.419424366 | 0.036932268 | Down |
| Niben101Scf04131g00006 | 0.689994085 | 0.719697499 | 10.00691175 | 0 | 0 | 0 | -4.755407478 | 0.024428043 | Down |
| Niben101Scf04181g00025 | 76.84558447 | 72.36097407 | 79.60596014 | 28.98746944 | 34.35789705 | 26.75819309 | -1.231720375 | 0.002095133 | Down |
| Niben101Scf04187g00026 | 14.08825257 | 14.44137738 | 10.56829901 | 7.865772175 | 4.792489773 | 3.442032869 | -1.179695181 | 0.01220318 | Down |
| Niben101Scf04198g04005 | 103.463113 | 125.9032547 | 90.80495481 | 39.02805668 | 37.30538378 | 54.82310323 | -1.156942685 | 0.004296786 | Down |
| Niben101Scf04216g05005 | 6.355907049 | 0.736613466 | 8.77895738 | 0 | 0 | 0 | -5.184502205 | 0.005684316 | Down |
| Niben101Scf04273g00001 | 10.89584066 | 4.54595739 | 14.67340019 | 0 | 0 | 0 | -5.47179015 | 0.001429086 | Down |
| Niben101Scf04287g06007 | 132.8378147 | 89.9308962 | 114.7611228 | 52.36322453 | 34.876196 | 49.72327968 | -1.193055393 | 3.08E-05 | Down |
| Niben101Scf04288g01010 | 2.712251074 | 2.829010217 | 1.20414773 | 0 | 0 | 0.422351825 | -3.809202521 | 0.040032955 | Down |
| Niben101Scf04328g00019 | 1.486984853 | 8.375387903 | 4.005037245 | 0.310661242 | 1.544134062 | 0.972523984 | -2.137949967 | 0.036154495 | Down |
| Niben101Scf04368g00007 | 1.341707036 | 1.399465908 | 11.58252158 | 0.467182941 | 0.928848527 | 0 | -3.288461643 | 0.023949052 | Down |
| Niben101Scf04400g02002 | 3.071627942 | 8.970801913 | 5.515404451 | 2.352992646 | 2.126453103 | 1.562492409 | -1.417406058 | 0.032388482 | Down |
| Niben101Scf04411g01001 | 45.47676129 | 69.48149345 | 34.50334412 | 18.06531246 | 23.27971624 | 13.9638026 | -1.308053675 | 0.001974727 | Down |
| Niben101Scf04444g01004 | 0 | 13.67425248 | 8.577352931 | 1.441537343 | 0.71651259 | 0 | -3.261630162 | 0.034170854 | Down |
| Niben101Scf04448g02007 | 46.29304763 | 88.19568834 | 20.5525472 | 13.32306036 | 23.05504709 | 5.664021691 | -1.751502898 | 0.000664625 | Down |
| Niben101Scf04641g03012 | 5.359575674 | 7.187527225 | 1.586313534 | 0 | 0 | 0 | -4.845185236 | 0.01250489 | Down |
| Niben101Scf04663g04002 | 0.262585143 | 2.465002054 | 1.360087412 | 0 | 0 | 0 | -4.601147153 | 0.026881267 | Down |
| Niben101Scf04664g03014 | 51.2483909 | 53.45457241 | 55.88346101 | 25.35827321 | 16.2455001 | 18.81694574 | -1.303975937 | 0.000240852 | Down |
| Niben101Scf04760g00010 | 1.043157811 | 2.720161248 | 5.403145784 | 0 | 0 | 0 | -4.811401379 | 0.014309308 | Down |
| Niben101Scf04776g01009 | 17.89679772 | 16.02947208 | 13.30019794 | 7.315441421 | 8.484285046 | 4.665011391 | -1.096689817 | 0.004642628 | Down |
| Niben101Scf04987g00020 | 12.5939909 | 8.520744027 | 13.04638053 | 5.688950669 | 2.827678935 | 0.742051714 | -1.813499252 | 0.007642429 | Down |
| Niben101Scf05018g00001 | 45.52904845 | 68.59524991 | 34.06325045 | 11.44955745 | 27.14157004 | 21.1380624 | -1.166069766 | 0.017255527 | Down |
| Niben101Scf05102g02013 | 6.906119898 | 5.659830034 | 2.044055748 | 0.515295812 | 0 | 0 | -4.57656602 | 0.005618191 | Down |
| Niben101Scf05151g03009 | 12.04652289 | 14.01493172 | 10.07939172 | 2.419963975 | 4.811348562 | 4.545413499 | -1.483174846 | 0.027060487 | Down |
| Niben101Scf05197g01010 | 40.8033539 | 87.24777275 | 29.58833784 | 24.50835943 | 24.36363953 | 6.115628359 | -1.407373744 | 0.003683936 | Down |
| Niben101Scf05307g04003 | 0.471479553 | 0 | 10.74514327 | 0 | 0.489599901 | 0 | -4.32683329 | 0.030540669 | Down |
| Niben101Scf05330g00009 | 103.7712354 | 210.5370087 | 152.0714864 | 70.06313058 | 93.30393115 | 28.27870527 | -1.176354386 | 0.000961679 | Down |
| Niben101Scf05372g05017 | 10.87194627 | 9.071976371 | 10.1362304 | 4.258818179 | 4.798159559 | 3.555257634 | -1.14406766 | 0.031212614 | Down |
| Niben101Scf05405g05011 | 13.07385944 | 8.727470939 | 3.250436751 | 2.18511515 | 2.17221222 | 2.280165234 | -1.791291807 | 0.048840772 | Down |
| Niben101Scf05414g00004 | 8.348620849 | 16.90380144 | 7.631040219 | 3.590991614 | 3.059817511 | 0.53531368 | -2.083739574 | 0.01178463 | Down |
| Niben101Scf05490g00005 | 43.10963042 | 70.58529644 | 33.23399032 | 21.46892206 | 14.05458645 | 21.85638667 | -1.224937807 | 0.001924508 | Down |
| Niben101Scf05581g00006 | 1.832756931 | 13.38158437 | 9.49295761 | 0 | 0.95159759 | 0.998889391 | -3.517541586 | 0.024947816 | Down |
| Niben101Scf05708g00002 | 23.83198686 | 22.54556006 | 9.760394762 | 4.052661861 | 3.453198186 | 4.833083604 | -2.056490548 | 0.001890615 | Down |
| Niben101Scf06080g03002 | 17.69644671 | 27.41594119 | 9.705241072 | 4.077734572 | 10.26926155 | 7.375526599 | -1.184851718 | 0.01583939 | Down |
| Niben101Scf06218g05003 | 21.56366003 | 30.13072497 | 20.65234414 | 3.825072315 | 17.74493265 | 6.208935778 | -1.245124856 | 0.021445883 | Down |
| Niben101Scf06318g00005 | 13.35647028 | 6.555976585 | 8.952866995 | 2.872508744 | 4.487287843 | 0.428208526 | -1.798855719 | 0.022190953 | Down |
| Niben101Scf06369g04002 | 1.327338018 | 5.999406061 | 1.833356561 | 0 | 0 | 0 | -5.002601474 | 0.008108577 | Down |
| Niben101Scf06442g00032 | 6.116727327 | 3.828027044 | 4.435512705 | 0 | 0.635181118 | 0.666747885 | -3.339378945 | 0.03168528 | Down |
| Niben101Scf06537g00004 | 4.62463386 | 7.074787543 | 4.471371949 | 0.966179647 | 1.280632578 | 0 | -2.735567342 | 0.006018196 | Down |
| Niben101Scf06541g00002 | 3.903627951 | 3.56271513 | 4.549331753 | 0 | 0.506706984 | 0.531888937 | -3.407425244 | 0.026317874 | Down |
| Niben101Scf06589g00009 | 7.122999279 | 2.971854328 | 4.427319024 | 0.992092511 | 0.493117142 | 0 | -3.205458322 | 0.018396077 | Down |
| Niben101Scf06722g00001 | 7.768330838 | 5.892907728 | 5.852638253 | 0.737709816 | 0.733353698 | 0.769799374 | -3.009785107 | 0.02439382 | Down |
| Niben101Scf06757g00019 | 7.393896343 | 10.02585308 | 1.531898603 | 0.772367324 | 0.383903278 | 2.014911113 | -2.420957972 | 0.018835837 | Down |
| Niben101Scf06761g01034 | 4.416059187 | 9.33354531 | 2.64850402 | 3.034882153 | 1.81017685 | 0.126675846 | -1.628052088 | 0.01944832 | Down |
| Niben101Scf07018g00003 | 3.915961689 | 13.88743302 | 12.98120712 | 0 | 4.066463635 | 0.853711154 | -2.505511455 | 0.033474308 | Down |
| Niben101Scf07049g00001 | 9.895424148 | 4.816658113 | 10.93427027 | 0.689118151 | 2.055146891 | 2.157282078 | -2.271175523 | 0.030349549 | Down |
| Niben101Scf07114g01001 | 5.061130625 | 10.07810275 | 2.383150843 | 0.480623936 | 1.433357669 | 0.501530543 | -2.710834239 | 0.019758466 | Down |
| Niben101Scf07188g00022 | 22.61297583 | 27.58413844 | 9.528918563 | 6.005476892 | 7.960020042 | 5.848927906 | -1.458317862 | 0.00579266 | Down |
| Niben101Scf07244g03021 | 7.224200362 | 50.86255605 | 9.978268497 | 0.628867384 | 5.001231778 | 0 | -3.432991442 | 0.000375206 | Down |
| Niben101Scf07247g04006 | 4.424460061 | 0.922985548 | 4.125052263 | 0 | 0 | 0.482283945 | -4.143388099 | 0.020427146 | Down |
| Niben101Scf07278g02004 | 8.220522637 | 21.76580045 | 3.930375051 | 1.321102782 | 3.28325444 | 0 | -2.738734522 | 0.011010669 | Down |
| Niben101Scf07323g01002 | 17.92691732 | 29.91783924 | 20.25913242 | 5.788184708 | 12.18495376 | 7.461132393 | -1.288116093 | 0.00412817 | Down |
| Niben101Scf07533g03002 | 20.46718692 | 15.65540143 | 13.19259834 | 9.027131671 | 5.667680325 | 5.453569509 | -1.187845291 | 0.031161133 | Down |
| Niben101Scf07728g02015 | 33.54444441 | 44.07641244 | 46.03166844 | 17.29274784 | 23.07164245 | 15.67062592 | -1.026731877 | 0.004435644 | Down |
| Niben101Scf07841g00007 | 2.211243309 | 6.458017078 | 1.832538829 | 0 | 0.459245581 | 0 | -4.241048335 | 0.015189148 | Down |
| Niben101Scf07842g00010 | 81.27225407 | 3.39083707 | 57.2503155 | 3.395883873 | 0 | 0 | -5.31999996 | 0.000115818 | Down |
| Niben101Scf07942g00005 | 4.369005384 | 7.848314442 | 8.046123973 | 2.789030696 | 2.772561693 | 0.793731937 | -1.574945155 | 0.022072996 | Down |
| Niben101Scf08006g01004 | 35.97555884 | 34.77858552 | 45.44858467 | 24.28958531 | 13.21204831 | 16.25979775 | -1.013918411 | 0.007159372 | Down |
| Niben101Scf08143g00006 | 140.6475431 | 124.833592 | 58.82288183 | 15.51335496 | 56.24402883 | 44.75552518 | -1.324971996 | 0.003434506 | Down |
| Niben101Scf08193g00024 | 70.02777705 | 113.8712108 | 91.14408305 | 39.38905506 | 40.64814073 | 40.31953171 | -1.068735696 | 4.04E-05 | Down |
| Niben101Scf08222g02003 | 59.71176419 | 109.2335438 | 51.38862204 | 42.86280849 | 41.33777548 | 16.02171692 | -1.027373915 | 0.002944081 | Down |
| Niben101Scf08635g03001 | 2.719690634 | 3.647275767 | 2.012417738 | 0.405856027 | 0 | 0 | -4.119399452 | 0.018805638 | Down |
| Niben101Scf08728g01001 | 13.72687367 | 7.158899524 | 9.649256987 | 2.816610728 | 0.509087067 | 3.740711123 | -1.998693872 | 0.002269158 | Down |
| Niben101Scf08995g00004 | 18.37697809 | 16.26382959 | 12.9798401 | 2.908577875 | 7.806787979 | 1.214039114 | -1.88341864 | 0.001049647 | Down |
| Niben101Scf09150g02001 | 4.711914798 | 9.829514113 | 8.367723124 | 2.812612576 | 0.699001081 | 0 | -2.625210505 | 0.031223355 | Down |
| Niben101Scf09264g00002 | 19.07791234 | 35.37634399 | 23.60605803 | 9.410827302 | 14.3080403 | 10.97550406 | -1.038837866 | 0.032459806 | Down |
| Niben101Scf09325g03007 | 4.540453347 | 4.735914396 | 0 | 0 | 0 | 0 | -4.663918764 | 0.033510702 | Down |
| Niben101Scf09372g03030 | 30.07598781 | 48.34176966 | 27.07027087 | 24.20685993 | 12.28795933 | 8.061648341 | -1.144444332 | 0.011926285 | Down |
| Niben101Scf09604g00009 | 6.257450658 | 10.08691349 | 11.49121702 | 2.376923881 | 2.95361042 | 4.340555506 | -1.397018972 | 0.022626976 | Down |
| Niben101Scf09638g00009 | 8.502980795 | 9.254633613 | 12.63816348 | 1.158550986 | 3.071226226 | 0.402982223 | -2.605634659 | 0.001096764 | Down |
| Niben101Scf10053g00023 | 9.680645509 | 7.378858738 | 6.171313637 | 3.111512073 | 3.479781198 | 0.811714849 | -1.550974296 | 0.044497687 | Down |
| Niben101Scf10122g01006 | 14.06594854 | 21.07356698 | 11.1271077 | 8.281682233 | 5.842617754 | 4.181577202 | -1.225427451 | 0.007586683 | Down |
| Niben101Scf11037g02051 | 34.09376801 | 56.50862719 | 25.15834983 | 8.293762544 | 20.36947757 | 10.18180236 | -1.435489604 | 0.001912336 | Down |
| Niben101Scf11253g05008 | 24.48996879 | 21.5109326 | 15.02151791 | 8.078605769 | 7.027039467 | 4.917509422 | -1.497718914 | 0.000895976 | Down |
| Niben101Scf11264g01008 | 2.524025879 | 3.510242872 | 4.793601251 | 0 | 1.310515815 | 0 | -2.921452382 | 0.047361019 | Down |
| Niben101Scf11524g00007 | 10.03346657 | 14.9505646 | 18.189289 | 5.240485774 | 5.209541125 | 3.124823479 | -1.565545334 | 0.005314671 | Down |
| Niben101Scf11738g00017 | 11.38541912 | 6.195937931 | 6.153597684 | 0.517096646 | 4.112345851 | 0 | -2.24200276 | 0.034814214 | Down |
| Niben101Scf11906g00004 | 38.0866133 | 49.65774518 | 32.87893769 | 27.18663754 | 5.273385876 | 18.68217328 | -1.129728953 | 0.026201559 | Down |
| Niben101Scf12017g00012 | 12.21273595 | 11.14616958 | 4.744286436 | 0.797339939 | 3.170526843 | 0 | -2.69658043 | 0.024886352 | Down |
| Niben101Scf12751g00015 | 101.3968122 | 86.38561106 | 43.29855794 | 35.57592629 | 17.68292664 | 51.46658671 | -1.003652382 | 0.022923461 | Down |
| Niben101Scf13057g00011 | 7.059884096 | 4.909202403 | 0 | 0 | 0 | 0 | -4.572873867 | 0.041059923 | Down |
| Niben101Scf13167g00007 | 94.97963424 | 104.2222402 | 40.38028735 | 14.91105156 | 39.33796948 | 19.15035784 | -1.567187016 | 0.000216987 | Down |
| Niben101Scf13167g02003 | 26.47980266 | 24.20988353 | 15.91674469 | 4.097901409 | 18.33166633 | 7.839618549 | -1.001070278 | 0.049642012 | Down |
| Niben101Scf13622g01021 | 2.588828981 | 2.700274951 | 4.916674564 | 0 | 0.448054218 | 0 | -4.275891699 | 0.012631893 | Down |
| Niben101Scf13703g01007 | 18.92904681 | 11.28223971 | 17.74147478 | 0 | 1.872051986 | 5.895263568 | -2.482433639 | 0.01316378 | Down |
| Niben101Scf13874g01006 | 44.11430401 | 26.29335524 | 10.8806993 | 8.777496451 | 10.17994371 | 10.6858591 | -1.327075977 | 0.029958805 | Down |
| Niben101Scf14115g01013 | 2.809638707 | 1.758354162 | 2.619507544 | 0.293495206 | 0 | 0.306261921 | -3.487357246 | 0.022460721 | Down |
| Niben101Scf14436g00007 | 10.72191117 | 11.18347654 | 11.1070537 | 2.133356501 | 2.120759202 | 6.121926637 | -1.531294849 | 0.044001208 | Down |
| Niben101Scf14566g01008 | 0.969229227 | 5.560243582 | 4.26719116 | 0.506229023 | 0.251619891 | 0.264124712 | -3.285671943 | 0.00551597 | Down |
| Niben101Scf14922g00048 | 5.883057734 | 2.832145978 | 2.109594277 | 0.709090311 | 0.23496773 | 0.986579937 | -2.37019418 | 0.016416525 | Down |
| Niben101Scf16498g00007 | 1.721391492 | 8.977476617 | 21.39870861 | 0 | 0 | 0 | -4.901651919 | 0.013219419 | Down |
| Niben101Scf16915g00006 | 3.137726265 | 7.854723845 | 5.200698802 | 0.655534545 | 0 | 1.36809914 | -2.869311415 | 0.042309961 | Down |
| Niben101Scf17671g00012 | 25.93105092 | 60.50065453 | 31.81088135 | 34.2159256 | 7.086225687 | 8.926070097 | -1.151387063 | 0.01833708 | Down |
| Niben101Scf17815g00007 | 11.98454673 | 8.333644692 | 7.449026689 | 1.669209639 | 3.31870618 | 0.870909203 | -2.132034834 | 0.047121414 | Down |
| Niben101Scf20961g00007 | 23.24946965 | 22.82384124 | 15.58416296 | 3.571533039 | 12.07150763 | 5.963025219 | -1.379739698 | 0.034394279 | Down |
| Niben101Scf22035g00002 | 7.979107926 | 5.140428741 | 4.619082191 | 1.961173172 | 1.949592601 | 1.534861521 | -1.593602974 | 0.019969664 | Down |
| Niben101Scf23078g00006 | 2.149640108 | 7.287083459 | 11.69100178 | 2.806895884 | 1.116128555 | 0.585798548 | -2.151485013 | 0.046875168 | Down |
| Niben101Scf29076g00011 | 49.59936107 | 40.56183329 | 33.5303391 | 12.64883002 | 27.56638317 | 11.42224623 | -1.141451918 | 0.001159937 | Down |
| Niben101Scf34140g00003 | 7.869218251 | 51.9838646 | 0 | 2.74006503 | 0 | 0 | -4.15405932 | 0.035880674 | Down |

**Table S2 LC-MS/MS analysis of ToCV P7 candidate interacting proteins**

| **Number** | **Accession** | **Description** | **Frequency** |
| --- | --- | --- | --- |
| 1 | XP_019226861.1 | mitogen-activated protein kinase 3 | 6 |
| 2 | XP_019225967.1 | remorin | 5 |
| 3 | XP_009609235.1 | S-adenosylmethionine synthase 2 | 3 |
| 4 | XP_016499136.1 | TOM1-like protein 2 | 3 |
| 5 | XP_016499512.1 | V-type proton ATPase catalytic subunit A | 2 |
| 6 | XP_009631810.1 | transmembrane emp24 domain-containing protein p24beta3 | 2 |
| 7 | XP_016471749.1 | 60S ribosomal protein L36-2 | 1 |
| 8 | XP_016508247.1 | myosin IB heavy chain | 1 |
| 9 | XP_016511137.1 | mannosylglycoprotein endo-beta-mannosidase | 1 |
| 10 | XP_009592425.1 | 3-hydroxyisobutyryl-CoA hydrolase-like protein 2, mitochondrial isoform X1 | 1 |

**Table S3 Identification of phosphorylated residues of P7 by LC-MS/MS**

| Peptide sequence | Peptide modified sequence | m/z | z |
| --- | --- | --- | --- |
| S39 | KIS(+79.97)DDDCPYVNNVAPFGSNRFNSQPPIVR | 1096.1672 | 3 |
| Y45 | KISDDDCPY(+79.97)VNNVAPFGSNRFNSQPPIVR | 1091.5056 | 3 |
| S54 | KISDDDCPYVNNVAPFGS(+79.97)NRFNSQPPIVR | 1086.8362 | 3 |
| KDKISDDDCPYVNNVAPFGS(+79.97)NR | 826.3572 | 3 |
| S59 | DKISDDDCPYVNNVAPFGSNRFNS(+79.97)QPPIVR | 1181.8838 | 3 |
| ISDDDCPYVNNVAPFGSNRFNS(+79.97)QPPIVR | 1113.484 | 3 |
| FFAKDKISDDDCPYVNNVAPFGSNRFNS(+79.97)QPPIVR | 1098.7919 | 4 |
| ISDDDCPYVNNVAPFGSNRFNS(+79.97)QPPIVR | 1086.8268 | 3 |

**Table S4 Primers used in this study**

| **Name** | **Primers (5'-3')** | **Purpose** |
| --- | --- | --- |
| PVX-P7-F | TTGGCGCGCCATGATTTCCACTTATTTTACCTTA | PVX-P7 construction |
| PVX-P7-R | TTGCGGCCGCTTAACGAACTATTGGAGGTTGTG |
| P7/mP7-attb-F | GGGGACAAGTTTGTACAAAAAAGCAGGCTGCATGATTTCCACTTATTTTACC | P7/mP7-DonR207 by gateway |
| P7/mP7-attb-R | GGGGACCACTTTGTACAAGAAAGCTGGGTCACGAACT ATTGGAGGTTGTGA |
| P7/P7S59A/P7S59D-pET32a-F | CGGGATCCATGATTTCCACTTATTTTACC | P7/P7S59A/P7S59D-pET32a construction |
| P7/P7S59A/P7S59D-pET32a-R | TTGCGGCCGCACGAACTATTGGAGGTTGTGA |
| P7/P7S59A -pGEX-4T-2-F | CGGGATCCATGATTTCCACTTATTTTACC | P7/P7S59A -pGEX-4T-2 construction |
| P7/P7S59A -pGEX-4T-2-R | CCCCCGGGACGAACTATT GGAGGTTGTG A |
| P7-cLUC-F | GACGAGCTCGGTACCATGATTTCCACTTATTTTACC | P7-cLUC construction |
| P7-cLUC-R | CGAGATCTGGTCGACACGAACTATTGGAGGTTGTGA |
| ToCV-CP-F | TAGATGATGGCGTAGATGAC | qRT-PCR of ToCV CP |
| ToCV-CP-R | CTAGTGGAGTGTACCTTCAAT |
| ToCV-P22-F | AGACACGGACTGCCTTAT | qRT-PCR of ToCV P22 |
| ToCV-P22-R | CACAACTCAAGATACACTCTG |
| NbMPK3-pGEX-4T-2-F | CGGGATCCATGGCTGATGCAAATATGGGT | NbMPK3-pGEX-4T-2 construction |
| NbMPK3-pGEX-4T-2-R | CCCCCGGGAGCATATTCAGGATTCAGTGA |
| NbMPK3-attb-F | GGGGACAAGTTTGTACAAAAAAGCAGGCTGCATGGCTGATGCAAATATGGGT | NbMPK3-DonR207 by gateway |
| NbMPK3-attb-R | GGGGACCACTTTGTACAAGAAAGCTGGGTCAGCATATTCAGGATTCAGTGA |
| TRV-NbMPK3-F | CGGGATCCAGCAACCTTTTGCTAAATGCA | TRV-MPK3 construction |
| TRV-NbMPK3-R | CCCCCGGGTTGGAGGAAGCCAAGATCAGC |
| NbMPK3-nLUC-F | ACGGGGGACGAGCTCATGGCTGATGCAAATATGGGT | NbMPK3-nLUC construction |
| NbMPK3-nLUC-R | GTATGGGTAGTCGACAGCATATTCAGGATTCAGTGA |
| NbREM1-nLUC-F | ACGGGGGACGAGCTCATGGCAGAAGTAGAAGCTACG | NbREM1-nLUC construction |
| NbREM1-nLUC-R | GTATGGGTAGTCGACAAAACATCCAAGGAGTTTCTT |
| NbREM1-pGEX-4T-2-F | CGGGATCCATGGCAGAAGTAGAAGCTACG | NbREM1-pGEX-4T-2 construction |
| NbREM1-pGEX-4T-2-R | CCCCCGGGAAAACATCCAAGGAGTTTCTT |
| PVX-CP-F | ATGTCAGCACCAGCTAGCACA | qRT-PCR of PVX-CP |
| PVX-CP-R | ATCTATCATTTCTGTTTGAGCAGA |
| Actin-F | AGGCTGTTCTTTCCCTCTATGC | qRT-PCR of Actin |
| Actin-R | CAACTTCTCCTTCACATCCCTAAC |
| NbMPK3-F | CAGATGGTACAGGGCACCAG | qRT-PCR of NbMPK3 |
| NbMPK3-R | GTCGAAGGAGGATGGAACGG |
| P7-F | atgatttccacttattttac | qRT-PCR of P7 |
| P7-R | ACGAACTATTGGAGGTTGTGA |
| TRV-MKK2-F | AGGAAGTGGCTTTCTAGCGGATCCATCTAACCCGACAAGTCCTCTC | TRV-MKK2 construction |
| TRV-MKK2-R | CTGGAACATCGTATGGGTACCCGGGCACCAAGACTCCATATATCTCC |
| TRV-MPK6-F | AGGAAGTGGCTTTCTAGCGGATCCTTCTGCACAGGGACTTGA | TRV-MPK6 construction |
| TRV-MPK6-R | CTGGAACATCGTATGGGTACCCGGGCGTGATCTCTACCAGGAA |
| TRV-MAPKKKα-F | AGGAAGTGGCTTTCTAGCGGATCCGTGATCACCATCTCTAGACCA | TRV-MAPKKKα construction |
| TRV-MAPKKKα-R | CTGGAACATCGTATGGGTACCCGGGCTAAAGAATTGGTCTTAGTTT |
